# **Pursuing the limits of child survival in the most and least developed countries**

Iván Mejía-Guevara<sup>1,2,\*</sup>, Wenyun Zuo<sup>1</sup>, Laust H. Mortensen<sup>3</sup>, and Shripad Tuljapurkar<sup>1</sup>

<sup>1</sup> Department of Biology, Stanford University, Stanford, California, United States of America

<sup>2</sup> Center for Population Health Sciences, Stanford University School of Medicine, Palo Alto, California, United States of America

<sup>3</sup> Section of Epidemiology, Department of Public Health, University of Copenhagen & Statistics Denmark, Copenhagen, Denmark

\* Corresponding author: [imejia@stanford.edu](mailto:imejia@stanford.edu)

## 1 Summary paragraph

2 **The epidemiological transition from young to old deaths in high-income countries reduced**  
3 **mortality at all ages, but a major role was played by a decline of infant and child mortality**  
4 **from infectious diseases<sup>1,2</sup> that greatly increased life expectancy at birth<sup>2,3</sup>. Over time,**  
5 **declines in infectious disease continue but chronic and degenerative causes persist<sup>4,5</sup>, so we**  
6 **might expect under-5 deaths to be concentrated in the first month of life. However, little is**  
7 **known about the age-pattern of this transition in early mortality or its potential limits.**  
8 **Here we first describe the limit using detailed data on Denmark, Japan, France, and the**  
9 **USA— developed countries with low under-5 mortality. The limiting pattern of under-5**  
10 **deaths concentrates in the first month, but is surprisingly dispersed over later ages: we call**  
11 **this the early rectangularization of mortality. Then we examine the progress towards this**  
12 **limit of 31 developing countries from sub-Saharan Africa (SSA)—the region with the**  
13 **highest under-5 mortality<sup>6</sup>. In these countries, we find that early deaths have large age-**  
14 **heterogeneities; and that the age patterns of death is an important marker of progress in**  
15 **the mortality transition at early ages. But a negative association between national income**  
16 **and under-5 mortality levels, confirmed here, does not help explain reductions in child**  
17 **mortality during the transition.**

## 18 19 Main

20 The epidemiological transition from young to old deaths in high-income countries has  
21 characterized mortality decline at all ages. But the decline of infant and child mortality from  
22 exogenous causes (infections or parasites, accidents)<sup>1,2</sup> led to substantial increases in life  
23 expectancy at birth<sup>2,3</sup>, and an increasing modal age-at-death for adults<sup>7</sup>. Over time, as declines in  
24 exogenous mortality continue, under-5 mortality (U5M) should shift towards ages close to birth,  
25 but is likely to remain high during the first month of life due to the persistence of endogenous  
26 causes of death (congenital malformations, injuries connected with birth)<sup>8</sup>. Here we identify a limit  
27 reached by the rich countries with very low U5M, and call this limiting pattern of death the *Early*  
28 *Rectangularization of the Mortality Curve*. This limiting age-distribution for U5M in rich countries  
29 is not reflected in Sustainable Development Goal 3, which sets a target of neonatal (NMR) and  
30 under-5 mortality rates of 12, respectively 25, deaths per 1,000 births by 2030 for countries with  
31 currently high U5M<sup>6</sup>. Here, we investigate the extent of progress towards our U5M limit in 31 sub-  
32 Saharan African (SSA) countries.

33  
34 In any year, U5M levels vary dramatically with age, and change at different rates with respect to  
35 age and across countries. These factors are not accounted for by established techniques, e.g., Gini  
36 coefficient, standard deviation of age at death, and life disparity (these do work at old ages as  
37 measures of mortality compression or rectangularization<sup>1,9,10</sup>, or as measures of lifespan inequality  
38 at adult ages<sup>11-14</sup>). To overcome these limitations for U5M, we use a generalized Gini ( $G_{[0]}$ ) index  
39 that is proportional to the average mortality rates, and accounts for relative as well as absolute  
40 differences across ages (Methods) (1). We expect inequality as measured by  $G_{[0]}$  to decline over  
41 time in response to declines in U5M at any age. In contrast, at adult ages inequality in lifespan can  
42 decline or increase depending on the ages at which mortality declines<sup>15,16</sup>.

43 We rely on historical data from Denmark (1901-2016), France (1975-2016), Japan (1980-2016),  
44 and the USA (1968-2016), with high-quality and fine-grained U5M records measured in  
45 weeks/months (Supplementary Methods). These countries are not only highly developed  
46 economically, but also display the lowest U5M levels ever recorded after more than 100 years of  
47 continuing declines (Fig 1a). Long-run convergence is shown by U5M in Denmark during the first  
48 80 years of the 20<sup>th</sup> Century, with  $G_{[0]}$  declining from 1.6 to 0.1 x1000 (an average annual decline  
49 of 2.4%). More recent data reveal that Japan has reached the lowest concentration of under-5  
50 mortality in 2016 ( $G_{[0]} = 0.025$  x1000) and we argue that Japan is close to the actual limit of U5M  
51 at that time as it is converging more rapidly than other developed countries— $G_{[0]}$  in Japan declined  
52 by 74% between 1980 and 2016, followed by France (65%), Denmark (60%), and the U.S. (54%)  
53 during the same period. The lower level and more rapid decline of neonatal mortality in Japan  
54 during the period explains its leading role in the mortality convergence (Fig 1b). By 1980, Japan's  
55 neonatal and under-5 mortality were around one third of the levels set by the SDG-3 by 2030 (4.1

56 and 8.4 per 1,000 births, respectively), and continued declining to lower levels of 0.7 and 2.3  
57 deaths per 1,000 births by 2016, respectively. Likewise, by 1975 France's NMR (7.6) and U5M  
58 (13.9) were around two-thirds of the respective SDG-3 limits, Denmark reached those limits  
59 between 1955-1965 (U5M was 24.7 x1000 in 1955 and NMR was 12.5 x1000 in 1965), and the  
60 USA was about to reach them around 1968 (NMR=13.6, U5M=21.5) (Fig. 1b).

61 In Figure 1c we show that the limiting pattern of under-5 mortality can vary, but the rectangular  
62 (or 'L') shape—characterized by an age pattern where mortality rates decline overall but remain  
63 high during the first month of life—remains a distinctive characteristic even at very advance stages  
64 of the mortality transition. Had all deaths occurred within the first month of life (as illustrated by  
65 the dashed diagonal line in Fig. 1b), the limiting pattern would be represented by a vertical line at  
66 age 0 and flat for older ages. The recent age-pattern in Japan is much less concentrated, even  
67 though U5M remains high in the first month after birth. The recent age-patterns of U5M from  
68 Denmark and France are similar to that in Japan, but with higher NMRs; whereas the age pattern  
69 from the USA also exhibits an 'L' shape, but neonatal and infant mortality (deaths within the first  
70 year of life) rates were the highest among the 4 countries (Fig. 1c).

71 The speed of convergence to the limiting pattern is determined by the combined effects of changing  
72 mortality levels and age structure. Thus, with some variations in neonatal mortality levels,  
73 Denmark and France have experienced similar transitions in the shape and concentration of  
74 mortality during the last 40 years (Fig. 2), but both are still behind Japan. The transition in the  
75 USA has been slower as its age pattern in 2016 was still similar to that observed in Japan in 1980,  
76 which explains the remaining differences in mortality concentration and age-inequality between  
77 these countries during the last 40 years. The generalized Lorenz curve flattens rapidly in Japan as

78 its  $G_{[0]}$  approaches the mean under-5 mortality rate ( $G_{[0]}=0.66 \cdot \bar{q}$ ; i.e., closest to the theoretical limit  
79 of  $G^*=0.98 \cdot \bar{q}$ ), with the lowest  $\bar{q}$  observed among these 4 countries (at  $\bar{q}=0.038 \times 1000$ ) (Fig. 2b).

80

81 Heterogeneities in mortality shapes, levels, and rates of convergence are far more pronounced  
82 across the least developed countries, as their epidemiologic transition has started more recently.

83 To appreciate this from a historical perspective, we note that Denmark in 1901 exhibited high  
84 mortality for neonates and infants and then declining smoothly and rapidly with age. But by 2016,

85 U5M in Denmark exhibits a clear rectangular shape (Extended Fig. 1). We observe roughly similar

86 declines for Rwanda between 1994 and 2014, with a rapid transition and early rectangularization

87 — even so, although Rwanda is likely to reach the SDG-3 by 2030<sup>17</sup>, the country is likely to be

88 well short of the U5M limit in developed countries even by 2050 (Extended Fig. 1). In general, the

89 SSA region is converging unevenly, as shown by values of the generalized Gini (Fig. 3a). As we

90 show there, Rwanda and Senegal have made outstanding progress in mortality decline and reduced

91 age-inequality during the last 20 years; meanwhile, countries like Nigeria have fallen behind and

92 still exhibit mortality levels and shapes only observed in the developed world a century ago.

93 Unlike Rwanda, other SSA countries will fall short in meeting the SDG-3 targets by 2030. For

94 instance, Kenya would make it by 2050, but Nigeria (and other countries) is expected to fall short

95 even by 2050 (Extended Data Fig. 1)<sup>17</sup>. A major cause of this delayed transition is the slow

96 convergence of neonatal deaths in most countries of the region (Fig. 3b).

97

98 At that current pace, what are the prospects of convergence towards Japan's current limit

99 distribution for countries in SSA? According to our predictions, the generalized Gini in Rwanda

100 and Kenya would still be 10 times larger in 2030 and 2050 than Japan in 2016, respectively; or 19  
101 times larger in Nigeria by 2050 (Extended Data Fig. 1). Therefore, most SSA countries face  
102 an important challenge just to meet the SDGs, but convergence to our early rectangularization  
103 limit of U5M does not look realistic in the foreseeable future (Fig. 3b). In any case, we expect that  
104 the latter convergence will become increasingly challenging in SSA countries, and will require  
105 progress in both technology and socioeconomic conditions.

106  
107 Our analysis relied on data from countries at opposite sides of the income distribution, and by  
108 using 2017 mortality and per capita GDP data we found an expected inverse association<sup>18</sup>—a  
109 concave-up shape with a declining monotonic hazard—as levels of U5M fall with economic  
110 development (Fig. 4a and Extended Data Fig. 2). However, income does not explain the  
111 remarkable differences in the rate of mortality decline within economic regions over time (between  
112 1990-2017), particularly at the lower tail of the income distribution—between 1990 and 2017, the  
113 association between income and the decline in the under-5 mortality rate changed between 0.20%  
114 and 0.73% in low-income countries (LIC), while it was positive and increasing for upper middle-  
115 income countries (UMC) or only varied from 0.13% to 0.42% in high-income countries (HIC)  
116 (Fig. 4b). These results contribute to the mixed evidence on the relationship between income and  
117 health/mortality, and the shape of that association<sup>19,18,20–23</sup>.

118 Our findings also suggest that economic performance was not a precondition for reducing U5M in  
119 SSA during its early transition, where policies and interventions have been effective in countries  
120 that have met the Millennium Development Goals for child mortality reduction (e.g., Rwanda and  
121 Tanzania)<sup>24</sup>. It is less clear, however, whether further progress would be feasible in the region  
122 while maintaining low levels of economic development.

123  
124 Our limit for child survival has scientifically important implications for the causes of early death.  
125 It is important in terms of whether future medical/technological advances would allow further  
126 reductions of neonatal deaths attributed to endogenous etiology (e.g., conditions originating in the  
127 perinatal period or congenital causes)<sup>25</sup>. This limit also has important policy implications for  
128 establishing realistic benchmarks in specific contexts; e.g., policies aiming to reach specific goals  
129 in poor regions, or to reduce gaps among disadvantaged or minority groups in high-income areas<sup>26</sup>.  
130 Our limit also shows that the age distribution of mortality is important in analyzing mortality  
131 convergence, and reveals sharp heterogeneities across and within regions. Age-specific progress  
132 in SSA may require a combination of structural investments that were effective in high-income  
133 countries independently of vaccination and medical technologies<sup>27</sup>, and a significant scale-up of  
134 programmes and interventions that target maternal and child care and services<sup>28</sup>. Finally, limited  
135 resources in SSA suggest that cost-effective/efficient strategies, such as investments skewed more  
136 to primary care than secondary/tertiary care, are likely be more beneficial at the current stage of  
137 their mortality transition<sup>29</sup>.

138 **References (Main text 29/30)**

- 139 1. Fries, J. F. Aging, Natural Death, and the Compression of Morbidity. *N. Engl. J. Med.* **303**,  
140 130–135 (1980).
- 141 2. Cutler, D. & Meara, E. Changes in the Age Distribution of Mortality over the Twentieth  
142 Century. in *Perspectives on the Economics of Aging* (ed. Wise, D.) (University of Chicago  
143 Press, 2004).
- 144 3. Keyfitz, N. *Applied Mathematical Demography*. (Springer, 2005).
- 145 4. Bourgeois-Pichat, J. La mesure de la mortalité infantile. Principes et méthodes. *Population* **6**,  
146 233–248 (1951).
- 147 5. Bourgeois-Pichat, J. La mesure de la mortalité infantile. II. Les causes de décès. *Population*  
148 **6**, 459–480 (1951).
- 149 6. UN IGME. *Levels & Trends in Child Mortality: Report 2017, Estimates Developed by the*  
150 *UN Inter-agency Group for Child Mortality Estimation*. (2017).
- 151 7. Canudas-Romo, V. The modal age at death and the shifting mortality hypothesis. *Demogr.*  
152 *Res.* **19**, 1179–1204 (2008).
- 153 8. Bourgeois-Pichat, J. An Analysis of Infant Mortality. in *Population Bulletin of the United*  
154 *Nations* 1–14 (1952).
- 155 9. Wilmoth, J. R. & Horiuchi, S. Rectangularization Revisited: Variability of Age at Death  
156 within Human Populations. *Demography* **36**, 475 (1999).
- 157 10. Kannisto, V. Measuring the compression of mortality. *Demogr. Res.* **3**, (2000).
- 158 11. Shkolnikov, V., Andreev, E. & Begun, A. Z. Gini coefficient as a life table function:  
159 Computation from discrete data, decomposition of differences and empirical examples.  
160 *Demogr. Res.* **8**, 305–358 (2003).



- 161 12. Edwards, R. D. & Tuljapurkar, S. Inequality in Life Spans and a New Perspective on  
162 Mortality Convergence across Industrialized Countries. *Popul. Dev. Rev.* **31**, 645–674  
163 (2005).
- 164 13. Schindler, S., Tuljapurkar, S., Gaillard, J.-M. & Coulson, T. Linking the population growth  
165 rate and the age-at-death distribution. *Theor. Popul. Biol.* **82**, 244–252 (2012).
- 166 14. van Raalte, A. A. & Caswell, H. Perturbation Analysis of Indices of Lifespan Variability.  
167 *Demography* **50**, 1615–1640 (2013).
- 168 15. Gillespie, D. O. S., Trotter, M. V. & Tuljapurkar, S. D. Divergence in Age Patterns of  
169 Mortality Change Drives International Divergence in Lifespan Inequality. *Demography* **51**,  
170 1003–1017 (2014).
- 171 16. Zhang, Z. & Vaupel, J. The age separating early deaths from late deaths. *Demogr. Res.* **20**,  
172 721–730 (2009).
- 173 17. Mejía-Guevara, I., Zuo, W., Bendavid, E., Li, N. & Tuljapurkar, S. Age distribution, trends,  
174 and forecasts of under-5 mortality in 31 sub-Saharan African countries: A modeling study.  
175 *PLOS Med.* **16**, e1002757 (2019).
- 176 18. Pritchett, L. & Summers, L. H. Wealthier is Healthier. *J. Hum. Resour.* **31**, 841–868 (1996).
- 177 19. Preston, S. H. The Changing Relation between Mortality and Level of Economic  
178 Development. *Popul. Stud.* **29**, 231–248 (1975).
- 179 20. Deaton, A. Health, Inequality, and Economic Development. *J. Econ. Lit.* **41**, 113–158  
180 (2003).
- 181 21. Mackenbach, J. P. *et al.* The shape of the relationship between income and self-assessed  
182 health: an international study. *Int. J. Epidemiol.* **34**, 286–293 (2005).

- 183 22. Wilkinson, R. G. & Pickett, K. E. Income inequality and population health: A review and  
184 explanation of the evidence. *Soc. Sci. Med.* **62**, 1768–1784 (2006).
- 185 23. Chetty, R. *et al.* The Association Between Income and Life Expectancy in the United States,  
186 2001-2014. *JAMA* **315**, 1750 (2016).
- 187 24. Moucheraud, C. *et al.* Countdown to 2015 country case studies: what have we learned about  
188 processes and progress towards MDGs 4 and 5? *BMC Public Health* **16**, (2016).
- 189 25. Pechholdová, M. Infant and Child Mortality in Industrialized Countries. in *International*  
190 *Encyclopedia of the Social & Behavioral Sciences (Second Edition)* (ed. Wright, J. D.) 14–  
191 20 (Elsevier, 2015). doi:10.1016/B978-0-08-097086-8.31049-2.
- 192 26. Thakrar, A. P., Forrest, A. D., Maltenfort, M. G. & Forrest, C. B. Child Mortality In The US  
193 And 19 OECD Comparator Nations: A 50-Year Time-Trend Analysis. *Health Aff.*  
194 *(Millwood)* **37**, 140–149 (2018).
- 195 27. Bhatia, A., Krieger, N. & Subramanian, S. V. Learning From History About Reducing Infant  
196 Mortality: Contrasting the Centrality of Structural Interventions to Early 20th-Century  
197 Successes in the United States to Their Neglect in Current Global Initiatives. *Milbank Q.* **97**,  
198 285–345 (2019).
- 199 28. Hug, L., Alexander, M., You, D. & Alkema, L. National, regional, and global levels and  
200 trends in neonatal mortality between 1990 and 2017, with scenario-based projections to  
201 2030: a systematic analysis. *Lancet Glob. Health* **7**, e710–e720 (2019).
- 202 29. GITAHI, G. *I SPEND A LOT OF MY TIME TRYING TO RECONCILE A BIG IDEA AND A*  
203 *SMALL NUMBER.* (2019).
- 204 30. Denmark, S. departement. *Befolkningsudvikling og sundhedsforhold 1901-60.* (1966).

- 205 31. Insee. Les décès en 2016. *National Institute of Statistics and Economic Studies*  
206 <https://www.insee.fr/fr/statistiques/3124970?sommaire=3053204> (2017).
- 207 32. e-Stat. Statistics of Japan. *e-Stat Portal Site of Official Statistics of Japan* [https://www.e-](https://www.e-stat.go.jp/en/stat-search/files?page=1&layout=datalist&toukei=00450011&tstat=000001028897&cycle=7&tclass1=000001053058&tclass2=000001053061&tclass3=000001053066)  
208 [stat.go.jp/en/stat-](https://www.e-stat.go.jp/en/stat-search/files?page=1&layout=datalist&toukei=00450011&tstat=000001028897&cycle=7&tclass1=000001053058&tclass2=000001053061&tclass3=000001053066)  
209 [search/files?page=1&layout=datalist&toukei=00450011&tstat=000001028897&cycle=7&tcl](https://www.e-stat.go.jp/en/stat-search/files?page=1&layout=datalist&toukei=00450011&tstat=000001028897&cycle=7&tclass1=000001053058&tclass2=000001053061&tclass3=000001053066)  
210 [ass1=000001053058&tclass2=000001053061&tclass3=000001053066](https://www.e-stat.go.jp/en/stat-search/files?page=1&layout=datalist&toukei=00450011&tstat=000001028897&cycle=7&tclass1=000001053058&tclass2=000001053061&tclass3=000001053066) (2018).
- 211 33. CDC. Vital Statistics Online Data Portal. *Centers for Disease Control and*  
212 *Prevention/National Center for Health Statistics*  
213 [https://www.cdc.gov/nchs/data\\_access/vitalstatsonline.htm](https://www.cdc.gov/nchs/data_access/vitalstatsonline.htm) (2018).
- 214 34. HMD. *Human Mortality Database*. [www.mortality.org](http://www.mortality.org) [www.humanmortality.de](http://www.humanmortality.de) (2017).
- 215 35. Borchers, H. *Package 'pracma'*. (2018).
- 216 36. Hill, K. Direct estimation of child mortality from birth histories. in *Tools for Demographic*  
217 *Estimation* (International Union for the Scientific Study of Population., 2013).
- 218 37. Hill, K., You, D., Inoue, M., Oestergaard, M. Z. & Technical Advisory Group of the United  
219 Nations Inter-agency Group for Child Mortality Estimation. Child Mortality Estimation:  
220 Accelerated Progress in Reducing Global Child Mortality, 1990–2010. *PLoS Med.* **9**,  
221 e1001303 (2012).
- 222 38. Silva, R. Child Mortality Estimation: Consistency of Under-Five Mortality Rate Estimates  
223 Using Full Birth Histories and Summary Birth Histories. *PLoS Med.* **9**, e1001296 (2012).
- 224 39. Camarda, C. G. **MortalitySmooth** : An R Package for Smoothing Poisson Counts with P-  
225 Splines. *J. Stat. Softw.* **50**, (2012).
- 226 40. Li, N., Lee, R. & Tuljapurkar, S. Using the Lee-Carter Method to Forecast Mortality for  
227 Populations with Limited Data. *Int. Stat. Rev. Rev. Int. Stat.* **72**, 19–36 (2004).

- 228 41. Hanada, K. A Formula of Gini's Concentration Ratio and Its Application to Life Tables. *J.*  
229 *Jpn. Stat. Soc.* **13**, (1983).
- 230 42. Wagstaff, A., Paci, P. & van Doorslaer, E. On the measurement of inequalities in health. *Soc.*  
231 *Sci. Med.* **33**, 545–557 (1991).
- 232 43. O'Donnell, O., O'Neill, S., Van Ourti, T. & Walsh, B. conindex: Estimation of concentration  
233 indices. *Stata J.* **16**, 112–138 (2016).
- 234 44. The World Bank. GDP per capita, PPP (constant 2011 international \$). *World Development*  
235 *Indicators* <https://datacatalog.worldbank.org/dataset/world-development-indicators> (2019).
- 236 45. Boggess, M. & MacDonald, K. Obtaining elasticities for independent variables.  
237 <https://www.stata.com/support/faqs/statistics/elasticities-using-margins/>  
238 <https://www.stata.com/support/faqs/statistics/elasticities-using-margins/> (2019).
- 239 46. Engelman, M., Canudas-Romo, V. & Agree, E. M. The Implications of Increased  
240 Survivorship for Mortality Variation in Aging Populations. *Popul. Dev. Rev.* **36**, 511–539  
241 (2010).
- 242 47. Guillot, M., Gerland, P., Pelletier, F. & Saabneh, A. Child Mortality Estimation: A Global  
243 Overview of Infant and Child Mortality Age Patterns in Light of New Empirical Data. *PLoS*  
244 *Med.* **9**, e1001299 (2012).
- 245 48. Jasseh, M. *Age patterns of mortality within childhood in sub-Saharan Africa [PhD*  
246 *dissertation]*. (London School of Hygiene and Tropical Medicine, 2003).
- 247 49. Moucheraud, C. *et al.* Countdown to 2015 country case studies: what have we learned about  
248 processes and progress towards MDGs 4 and 5? *BMC Public Health* **16**, 794 (2016).
- 249 50. Binagwaho, A. *et al.* Rwanda 20 years on: investing in life. *The Lancet* **384**, 371–375 (2014).

250 51. Bryce, J. *et al.* “Real-Time” Monitoring of Under-Five Mortality: Lessons for Strengthened  
251 Vital Statistics Systems. *PLOS Med.* **13**, e1001904 (2016).

252

## 253 **Methods**

### 254 *Sources and retrospective mortality data*

255 We collected age profiles of under-1 mortality from publicly available sources from Denmark  
256 (1901-2016)<sup>30</sup>, France (1975-2016)<sup>31</sup>, Japan (1980-2016)<sup>32</sup>, and the USA (1968-2016)<sup>33</sup>. Mortality  
257 rates for ages 1, 2, 3, and 4 were not available for these 4 countries, but we obtained the  
258 corresponding rates as reported in the Human Mortality Database (HMD) for each country<sup>34</sup>  
259 (Supplementary Fig. S1). We then adjusted monthly-based under-5 mortality profiles using a two-  
260 dimensional linear interpolation method<sup>35</sup>.

261 Data from sub-Saharan Africa (SSA) were obtained from birth histories of 106 nationally  
262 representative Demographic and Health Surveys (DHS) from 31 countries from the period between  
263 1990 and 2017. The DHS Program collects health and demographic information for women in  
264 reproductive age (15-49 years old) and their children, using a two-stage stratified cluster sampling  
265 design that defines strata by region and by rural-urban within each region. A sampling frame  
266 consisting of census enumeration units or tracks or Primary Sampling Units (PSUs) that cover the  
267 entire country is used for the random selection of PSUs in the first stage, with probability  
268 proportional to sampling size. Clusters correspond to selected or further split PSUs (or blocks). In  
269 the second stage, households are selected systematically from a list of previously enumerated  
270 households within each selected cluster or block.

271 Mortality profiles by age were assessed using full birth history (FBH) data available for individual  
272 women aged 15 to 49 years in DHS surveys, where the respondent mother is asked about the date

273 of birth of each of her ever-born children, and the age at death if the child has already died<sup>36</sup>. The  
274 complete list of countries included in this study are in the Extended Data Table 1.

### 275 **‘Conditional’ life-table age distribution of under-5 deaths**

276 We used life-table age distributions of death, constructed by Mejía-Guevara et al. (2019) based on  
277 the following demographic analysis<sup>17</sup>.

278 First, using death reports by households and retrospective information from full birth history  
279 (FBH) data from DHS<sup>36</sup>, estimates of age-specific death rates  $m_{[x]}$  ( $[x]$  stands for age in months)  
280 were obtained from survey estimates of the number of events and total time to event<sup>36</sup>, and used  
281 to compute period life-table probabilities of dying,  $q_{[x]}$  (probability of dying between month  $x$  and  
282 month  $x+1$ ), assuming a uniform distribution of deaths across age.

283 Second, mortality rates by age were adjusted using the most recent estimates of neonatal, infant,  
284 and under-5 mortality rates from the Inter-agency Group for Child Mortality Estimation  
285 (IGME)<sup>6,37</sup> to minimize the risk of measurement errors in direct estimates of under-5 deaths based  
286 on FBH [e.g., survivor and truncation bias]<sup>36,38</sup>. After the previous adjustment, mortality profiles  
287 were smoothed over ages and years by using a two-dimensional P-Spline smoothing and  
288 generalized linear model, assuming that the number of deaths at a given rate are Poisson-  
289 distributed<sup>39</sup>.

290 Third, a variant of the Lee-Carter (LC)<sup>40</sup> model (LLT), suitable for mortality profiles using datasets  
291 that contain multi-year gaps, was used to fit the age mortality profiles after smoothing for each  
292 country. The resulting fits were first used to generate smoothed point estimates of age-specific  
293 death rates within the 1990-2017 period.

294 More details about the construction of age profiles, adjustment, fit, and goodness of fit are available  
295 elsewhere<sup>17</sup>.

## 296 **Early mortality compression, convergence in distribution, and age-inequality**

### 297 **1) *Generalized concentration index and the potential limits of under-5 mortality decline***

298 To measure the degree of mortality compression of U5M age profiles and age-inequality we use  
299 the Lorenz or concentration curve, denoted here as  $L_{[0]}$ , and the Gini coefficient. We build on  
300 Hanada (1983)<sup>41</sup> and Shkolnikov et al. (2003)<sup>11</sup> who introduced the Gini coefficient as a measure  
301 of inequality of life table data. In general, the concentration curve plots the cumulative proportion  
302 of one variable (e.g., health) against the cumulative proportion of the population ranked by another  
303 variable (e.g., income). If the ranking of units of analysis (by health) is the same as the ranking of  
304 the population, the concentration and the Lorenz curve are the same. The concentration (Lorenz)  
305 curve lies below the line of 45° when poor health is concentrated in the lowest ranked group<sup>42</sup>.  
306 The Concentration (Gini) index (C) is then calculated as twice the area between the concentration  
307 (Lorenz) curve and the diagonal, and we define it to measure concentration of under-5 mortality  
308 as<sup>42</sup>:

$$C(q|m) = \frac{2cov(q_{[x]}, R_{[x]})}{\bar{q}} = \frac{1}{n} \sum_{x=0}^{59} \frac{q_{[x]}}{\bar{q}} (2R_{[x]} - 1), \quad (1)$$

309 where  $q_{[a]}$  is defined as before as the probability of dying between month  $x$  and month  $x+1$ ,  $R_{[x]}$   
310 is the relative rank of the probability of dying at month  $x$ ,  $\bar{q} = \sum_{a=0}^{59} q_{[a]}/n$ , ( $n = 60$ ) is the mean  
311 level of mortality rate in the age range of 0 to 59 months.

312 The Gini index as defined in equation (1) is a measure of relative inequality, and it is invariant to  
313 proportionate changes in mortality levels. This represents a limitation in the context of child  
314 mortality, particularly at advance stages of the transition where levels or changes in the neonatal  
315 mortality occur disproportionately in relation to those in other age groups (see Extended Data Fig.  
316 3). To address this limitation, we used a generalized version of the Gini index ( $G_{[0]}$ ) that is obtained

317 by multiplying  $C(q | m)$  by the mean level of mortality rate ( $\bar{q}$ ). With this adjustment,  $G_{[0]}$  becomes  
318 invariant to equal improvements in mortality across age groups. The generalized Gini can then be  
319 expressed as:

$$G_{[0]}(q|m) = \frac{1}{n} \sum_{x=0}^{59} q_{[x]}(2R_{[x]} - 1). \quad (2)$$

320 In the context of U5M, we interpret declining values of  $G_{[0]}$  as evidence of reduced inequality,  
321 convergence or early compression of under-5 deaths, with the relative mortality concentrated at  
322 ages close to 0, but declining with decreasing the mean probability of dying  $\bar{q}$ .

323 An important feature of this index is that it is upper bounded by  $\bar{q} \left(\frac{n-1}{n}\right)$ , with  $n=60$ , the number  
324 of age groups. This upper limit is particularly relevant for this research because under-5 mortality  
325 is more concentrated at early ages, the Lorenz curve is below the diagonal, and although the Gini  
326 approaches 1 [more precisely  $\left(\frac{1-n}{n}\right)$ ] as mortality concentrates around age 0,  $G_{[0]}$  decreases with  
327 the decline of the mean probability of dying. That is, the generalized Gini index approaches the  
328 mean probability of death as the early rectangularization of mortality proceeds. In the hypothetical  
329 event of perfect rectangularization, where all deaths are concentrated at age 0 ( $q_{[x]} \rightarrow 0$ , for  $x >$   
330 0), then the limit of  $G_{[0]}$  is proportional to the neonatal mortality level [ $G_{[0]} \rightarrow q_{[0]} \left(\frac{1-n}{n^2}\right)$ ], and  
331 U5M approaches  $q_{[0]}$  in that limit. In Figs. 1b and 3b we illustrate this hypothetical scenario—of  
332 all under-5 deaths occurring at the neonatal level—with diagonal dashed lines, that illustrate the  
333 extent of mortality convergence across countries as their neonatal and U5M rates decline at  
334 different rates. Analysis of mortality concentration was conducted using the *Stata* command  
335 ‘conindex’<sup>43</sup>.

336 **2) Other measures of lifespan inequality**



337 To measure changes in age patterns of under-5 mortality and convergence in distribution towards  
338 age 0, we considered other measures of inequality that have been used in previous studies to  
339 analyze mortality of adult profiles. We first computed the minimum interval where a percentage  $p$   
340 of the total under-5 deaths takes place, that we denoted  $A_p$ . This indicator is equivalent to the C-  
341 family of indicators proposed by Kannisto<sup>10</sup> for assessing compression of mortality, except that  
342 the author used it for adult mortality and our indicator always includes the age of 0 (modal age for  
343 under-5 deaths)—the age where the higher percentage of under-5 deaths occurs. For instance,  
344 while  $A_{75}$  represents the interval where 75% of under-5 deaths take place,  $C_{75}$  is the age interval  
345 where 75% of deaths in the whole population takes place (Extended Data Fig. 4).

346 Another indicator that we considered to account for differences across age groups and compression  
347 of U5M is the ‘conditional’ mean-age-at-death based on survival to age ‘ $x$ ’ months (that we denote  
348 as  $[x]$  along this study) but death by age 5 years; we denote these by  $E_{[x]}$ . Thus,  $E_{[0]}$ ,  $E_{[1]}$ , and  $E_{[12]}$   
349 respectively represent the ‘conditional’ mean age-at-death after surviving birth, survival to age 1  
350 month, and survival to age 12 months. Finally, we assessed the between-individual inequality of  
351 age-at-death using the ‘conditional’ standard deviation  $S_{[x]}$  that assumes survival to age ‘ $x$ ’ and  
352 death by age 5 years. We selected this indicator on the basis of theoretical<sup>11</sup> and empirical<sup>12</sup>  
353 findings on measures of lifespan inequality. Formally, we estimated  $E_{[x]}$  and  $S_{[x]}$  using the  
354 following expressions:

$$E_{[x]} = \frac{\int_x^\omega a \cdot \phi(a) da}{(l_{[x]} - l_{[\omega]})}, \quad (2)$$

$$S_{[x]} = \sqrt{\frac{\int_x^\omega (a - E_{[x]})^2 \cdot \phi(a) da}{(l_{[x]} - l_{[\omega]})}}, \quad (3)$$

355 where  $\omega$  is the oldest age in the conditional life table (59 months),  $l_{[x]}$  is the survivorship or  
356 probability of living to at least age  $x$ , and  $\phi(a) = \mu(a)l(a)$  is a density representing the

357 probability that an individual dies at age  $a$  [ $\mu(a)$  is the age-specific mortality rate].  
358 As with the Gini coefficient, these three indicators ( $A_{75}$ ,  $E_{[x]}$ ,  $S_{[x]}$ ) represent relative measures of  
359 mean and variation and did not account for differences in the level of mortality across age  
360 groups. This was particularly problematic for analyzing age profiles of developed countries,  
361 where these indicators provided evidence of relative mortality differences that did not account  
362 for changes in absolute mortality levels across these countries, particularly at the neonatal level.

### 363 **Conditional marginal effects of income on under-5 mortality**

364 Using information of GDP per capita—expressed in international Purchasing Power Parity (PPP)  
365 2011 United States Dollars (USD)—and under-5 mortality for 217 countries obtained from the  
366 World Development Indicators<sup>44</sup>, we conducted an ecological association of mortality an national  
367 income using a scatter plot association with values from 2017. We superimposed the association  
368 from 1990 and 2017 using average values of U5M and income of countries stratified by 4 economic  
369 regions: low-income (LIC), low-middle-income (LMC), upper-middle-income (UMC), and high-  
370 income (HIC) (Fig. 3a). We further adjusted a curve that represents the prediction of under-5  
371 mortality from an estimated fractional polynomial of income using the command ‘`twoway ffit`’  
372 from Stata. We replicated the ecological analysis using values from 1990 and with neonatal  
373 mortality rates, highlighting in color results from representative countries from each region (i.e;  
374 Rwanda from region 1; Nigeria from region 2; Gabon from region 3; and Denmark, France, Japan,  
375 and the U.S.A from region 4: Extended Data Fig. 2).

376 To estimate income elasticities of under-5 mortality, we fitted linear regression models with under-  
377 5 mortality as dependent variable and real GPD per capita ( $gdp$ ) as independent variable,  
378 controlling for the year of observation, using the following linear specification:

$$E[u5mr|gdp] = \widehat{u5mr} = \hat{\alpha} + \hat{\beta} \cdot gdp + year. \quad (7)$$

379 With the predicted values of under-5 mortality ( $\widehat{u5mr}$ ) from model (7), the average elasticities are  
380 estimated as follows:

$$\begin{aligned}\frac{\partial(\log u5mr)}{\partial(\log gdp)} &= \frac{\partial(u5mr)}{\partial(gdp)} \cdot \frac{gdp}{u5mr} \\ &\approx \hat{\beta} \cdot \frac{gdp}{\widehat{u5mr}} \\ &\approx \frac{\frac{\Delta u5mr}{\widehat{u5mr}}}{\frac{\Delta gdp}{gdp}}\end{aligned}\tag{8}$$

381 The elasticity can then be interpreted as the percentage/proportionate change in the expected  
382 mortality for a percentage/proportionate change in the GDP per capita. Elasticities were calculated  
383 in a yearly-basis relative to the median GDP per capita value of the corresponding year and region  
384 using a regression approach and the post-estimation command ‘eyex’ from *Stata*<sup>45</sup>.

### 385 **Strengths and limitations**

386 Our study builds on previous research that analyzed inequality in the length of life and convergence  
387 of adult mortality<sup>11,12,46</sup>. Using under-5 mortality profiles from narrow-age groups from Denmark,  
388 France, Japan, and the USA from publicly available data, and from 31 SSA countries with data  
389 constructed by Mejía-Guevara et al. (2019)<sup>17</sup> for the forecasting of mortality rates and the  
390 assessment of the SDG-3 by 2030, this study is—to our knowledge—the first to use this kind of  
391 mortality patterns to explore the potential limit of child survival, by assessing compression,  
392 convergence and under-5 age-inequality. In particular, the age profiles of under-5 mortality for  
393 high-income countries allowed us to investigate potential limits in child survival, as data for the 4  
394 developed countries in our sample included the most recent trends of under-5 mortality patterns,  
395 except for Denmark where additionally relied on annual information as far as 1901, allowing a  
396 broader analysis of the mortality transition of under-5 deaths during the last 120 years. We

397 investigated the extent of early compression, age-inequality and variation in under-5 mortality,  
398 and we found important differences in the patterns of change across countries over time, with a  
399 positive association between the rates of mortality change and age-inequality. We identified Japan  
400 as the leading country in the under-5 mortality convergence, not only due to its lowest neonatal  
401 and under-5 mortality levels, but also because the early compression and the least inequality of  
402 mortality patterns that it has achieved in the most recent years.

403 To highlight differences in the evolution of age-patterns, we examine the youngest ages at which  
404 75% of under-5 mortality takes place in a country that we denote by  $A_{75}$  (Extended Data Fig. 4).  
405 In 1980, 75% of deaths in Japan occurred within the first 12 months of life and that percentage  
406 remained around that level because its sharp decline in neonatal mortality relative to other ages, in  
407 contrast with that observed in the USA over the past 50 years, where they occurred within the first  
408 5 months because the relative importance of neonatal mortality remained the same. With much  
409 higher levels of mortality at all ages and despite being on track to meet the SDG-3 of child  
410 mortality reduction(13), Rwanda and Senegal will expect to exhibit mortality profiles comparable  
411 to those observed in Denmark and France more than 50 years ago (Fig. 2 and Extended Data Fig.  
412 1), and with larger neonatal levels. The gap is even larger for several SSA countries, like Chad and  
413 Nigeria (Extended Data Table 1).

414 We identified salient differences across SSA countries in terms of distribution of deaths by age  
415 and time, convergence, and inequality in mortality reduction by age; particularly after stratifying  
416 countries on the basis of their achieved ARR between 1990 and 2016. On the one hand, countries  
417 with an ARR below 3.2% experienced a slower convergence process both in terms of mean and  
418 distribution of age-at-death. Mortality reductions occurred at different rates across under-5 ages,  
419 the mean and dispersion of age-at-death remained constant or have increased in most countries,

420 which is in line with results from previous studies<sup>47</sup>, showing unusual high values of  ${}_4q_1$  (the  
421 probability of children dying between age 1y and 5y) relative to  ${}_1q_0$  (the probability of dying  
422 during the first year of life) in several countries from SSA, that may be attributable to true  
423 epidemiological patterns (e.g., disease environments characterized by high prevalence of  
424 infectious diseases—malaria, measles, and diarrhea) rather than to data quality issues as similar  
425 patterns have been found in previous studies based on Demographic Surveillance Systems (DSS)  
426 data<sup>47,48</sup>. On the other hand, our findings revealed substantive evidence of mortality convergence,  
427 both in terms of mean and distribution, for countries that have reached higher ARR ( $\geq 3.2\%$ ),  
428 including countries that have met the MDG-4—e.g., Ethiopia, Malawi, Niger, Tanzania, and  
429 Rwanda<sup>49</sup>. However, when compared with the age profiles of highly developed countries, even  
430 those like Rwanda and Senegal which are on track to achieve the SDGs by 2030<sup>17</sup>, face a  
431 difficult path ahead to achieve further reductions of child mortality according to our estimates.  
432 The relationship between national income and under-5 mortality is in line with previous evidence  
433 highlighting income as a key predictor of mortality gaps across economic regions<sup>18</sup>. We included  
434 that evidence as our analysis is based on mortality distributions from two groups of countries  
435 situated at both extremes of the income distribution and stages of the mortality transition. The  
436 analysis reveal that despite that association, it is unclear whether increases in income are enough  
437 to overcome the mortality gaps between countries in advanced transitions, for example between  
438 Japan and the USA, or between countries in the earliest transition, even though the important  
439 reductions achieved in countries like Rwanda during the past 25 years may not be attributed to  
440 income growth changes but to the implementation of key policy interventions<sup>50</sup>. It is also  
441 unclear, and our data are not suitable to response whether further reductions in mortality in poor  
442 settings may be achievable without substantial improvements in economic development, or the

443 extent to which the USA would be able to reach similar levels as Japan despite its more  
444 advanced economic position.

445 The scope of this study is limited for several reasons. Although our data for Denmark, France,  
446 Japan, and the USA were obtained from high quality vital registration records that represent  
447 diverse world regions, we only had information from those 4 developed countries. For SSA, we  
448 relied on full-life histories from survey data, which are subject to several sources of error; as vital  
449 statistics for this group of countries are inexistent or deficient in the countries included in our  
450 study<sup>51</sup>. Second, we used different measures of inequality to improve the robustness of our analysis  
451 as they differ in their underlying properties and sensitivity to age-specific mortality change<sup>14</sup>.

452 Third, because of the nature of the survey data, we cannot infer causality neither in the association  
453 of the average decline of mortality and age-inequality nor between mortality and national income,  
454 and further research should explore the underlying risk factors, social determinants, and true  
455 epidemiological patterns behind under-5 mortality change by age, particularly in the SSA region.

## Figures and Tables

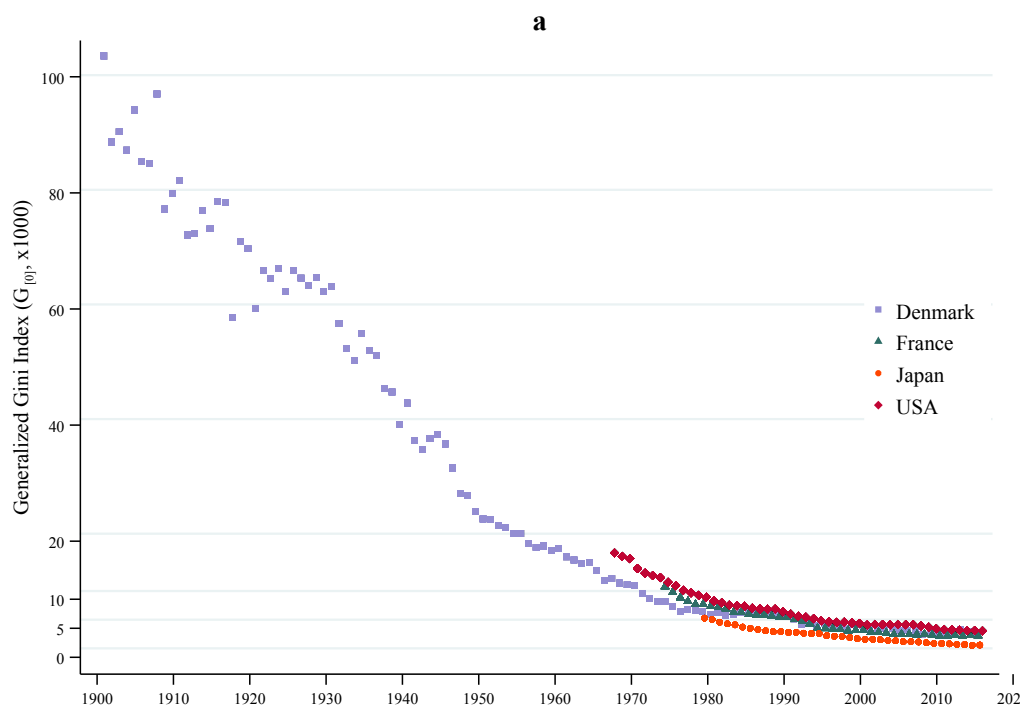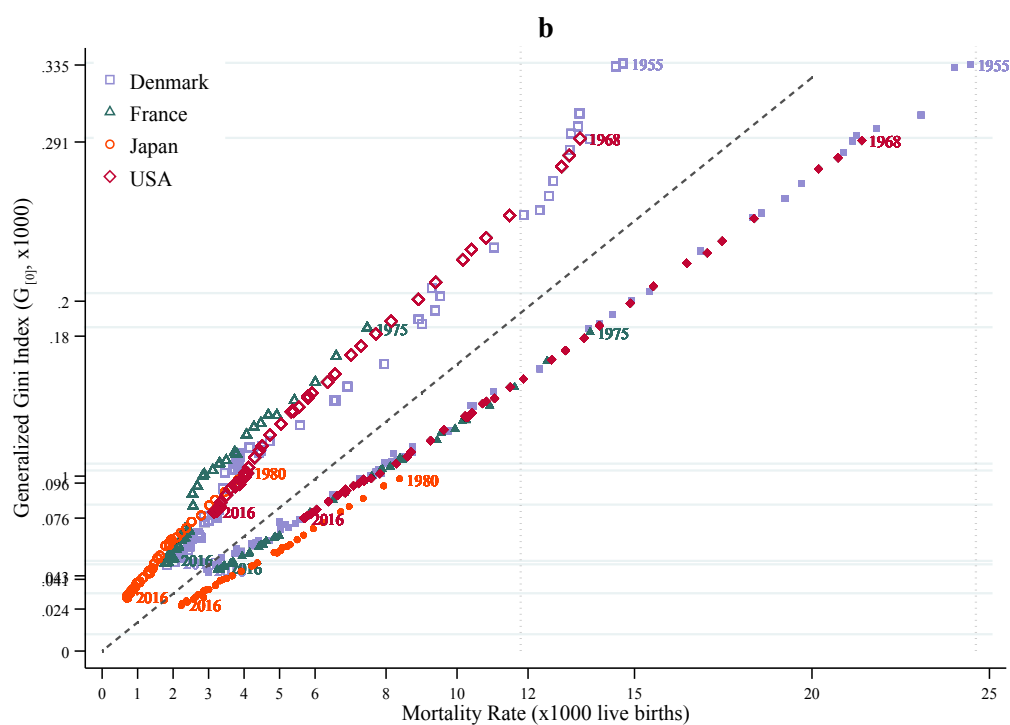

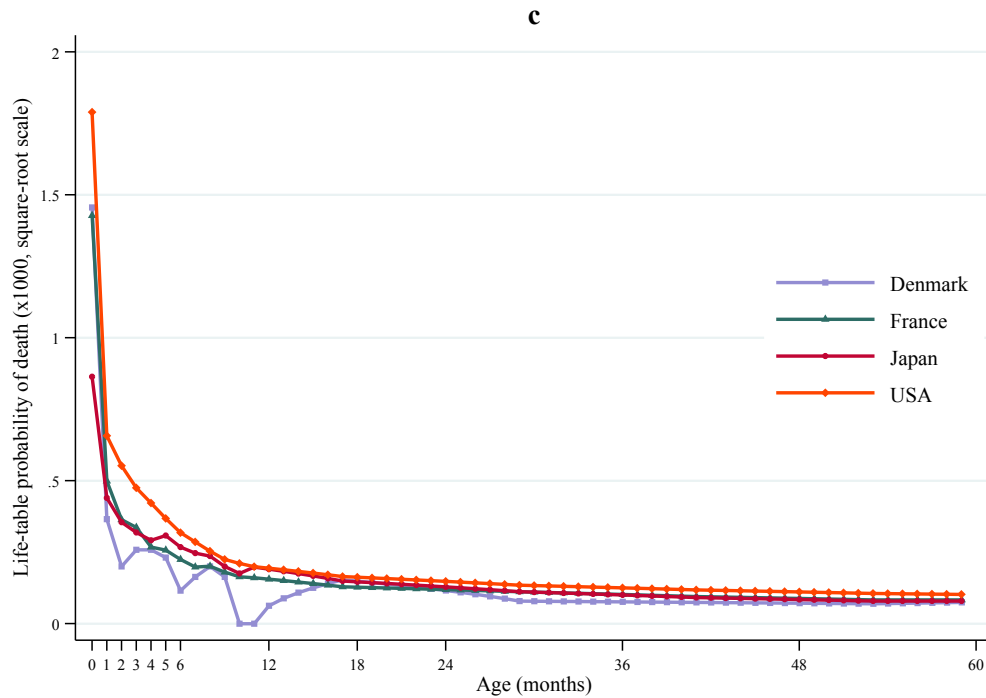

**Fig. 1 | Convergence of under-5 mortality and the limiting patterns of under-5 deaths. a,** Trends of under-5 mortality (U5M) compression by country over time. **b,** Convergence of Neonatal and U5M in the last 65 years. **c),** Life-table distribution of under-5 deaths for Denmark and Japan in 2016. Data are for Denmark, France, Japan, and the USA for the period between 1980 and 2016. In **a** and **b**, Mortality compression/convergence was assessed using the generalized Gini index ( $G_{[0]}$ ), which accounts for both changes in the age distribution and levels of mortality across countries over time, and smaller values of  $G_{[0]}$  indicate early compression (less concentration of deaths), less inequality, or more rapid convergence of under-5 mortality. The dashed diagonal line in **a** illustrates the hypothetical case of perfect rectangularization of the U5M curve where all deaths are concentrated at age 0 (the mean probability of death  $\bar{q} \rightarrow q_{[0]}/60$ , where  $q_{[0]}$  represents the neonatal mortality rate). In **c**, we illustrate the early rectangularization of the mortality distribution, represented the empirical limiting patterns of under-5 deaths in these four countries in 2016 (probabilities of death are per 1,000 in a squared-root scale).



### Japan

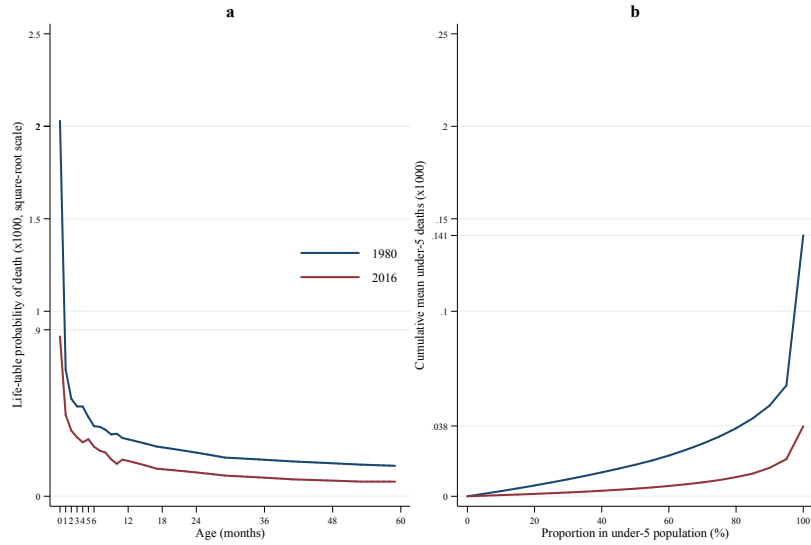

### USA

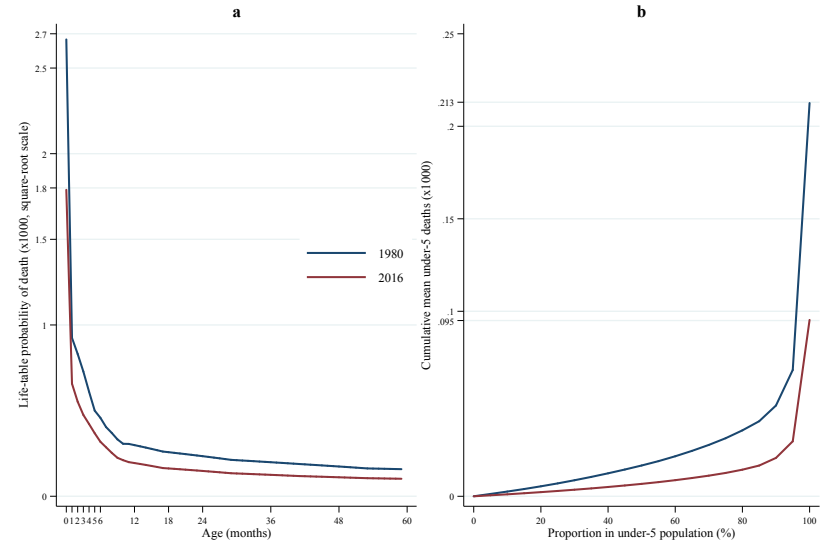

### Denmark

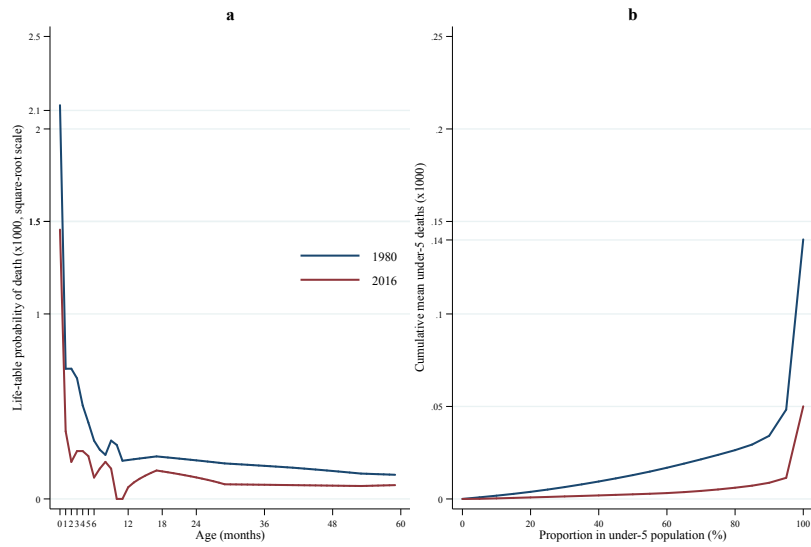

### France

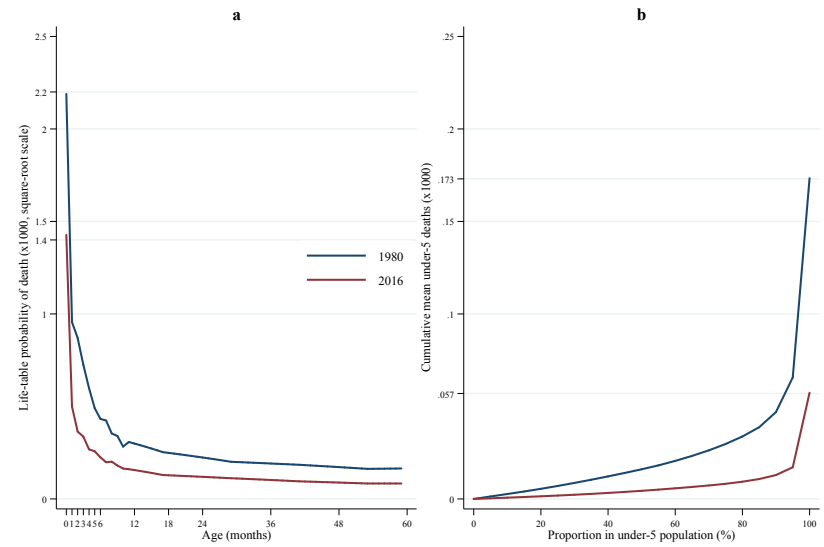

**Fig. 2 | Age patterns of under-5 deaths and inequality in the age at death. a,** Detailed age-at-death distribution of under-5 deaths in four developed countries (Denmark, France, Japan, and the USA). Age is measured in months in the x-axis and life-table probabilities of dying are represented in the y-axis (x1000 in a square-root scale). **b,** Generalized Lorenz curves in the same selected countries. Generalized Lorenz curves are constructed as the product of the standard Lorenz curve (Extended Data Fig. 1) and the mean mortality rates across ages ( $\bar{q}$ , measured in months). It therefore illustrates the cumulative percentage of under-5 population (x-axis), ranked by the level of mortality at each age, and graphed against the cumulative mean under-5 deaths (y-axis). The Lorenz curve flattens down more rapidly in Japan as its  $G_{[0]}$  approaches the mean under-5 mortality rate ( $G_{[0]}=0.66 \cdot \bar{q}$ ; i.e., closer to the theoretical limit of  $G^*=0.98 \cdot \bar{q}$ ), with the lowest  $\bar{q}$  observed among these 4 countries (at  $\bar{q}=0.038 \times 1000$ ) (Fig. 2b) (Supplementary Methods and Extended Data Table1).

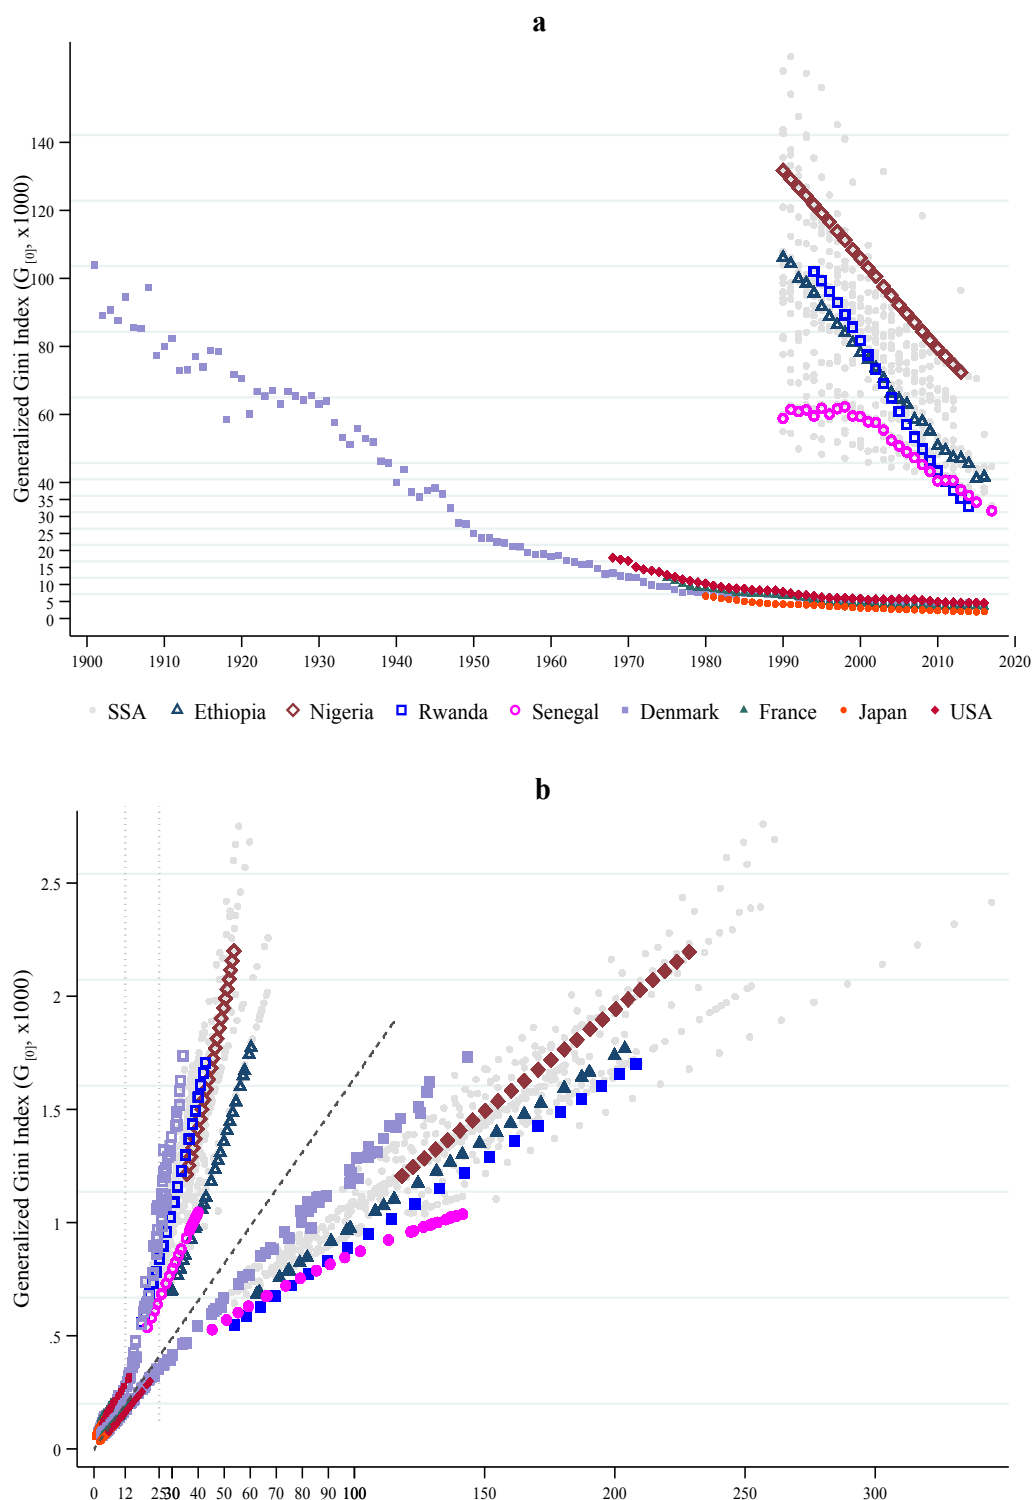

**Fig. 3 | Compression and convergence of under-5 mortality. a,** Trends of under-5 mortality compression by country over time. **b,** Convergence of neonatal (hollow markers) and under-5 mortality (solid markers) by country over time. Data are for Denmark (1901-016), France (1975-2016), Japan (1980-2016), the USA (1968-2016), and from 31 SSA countries (1990-2017). Compression and convergence of mortality were assessed using the generalized Gini index

( $G_{[0]}$ ), where smaller values of  $G_{[0]}$  indicate early compression (concentration of deaths towards age 0), convergence to lower mortality levels, or less inequality. Data are from publicly available mortality records for high-developed countries and from the Demographic and Health Surveys for 31 SSA countries (Supplementary Methods).

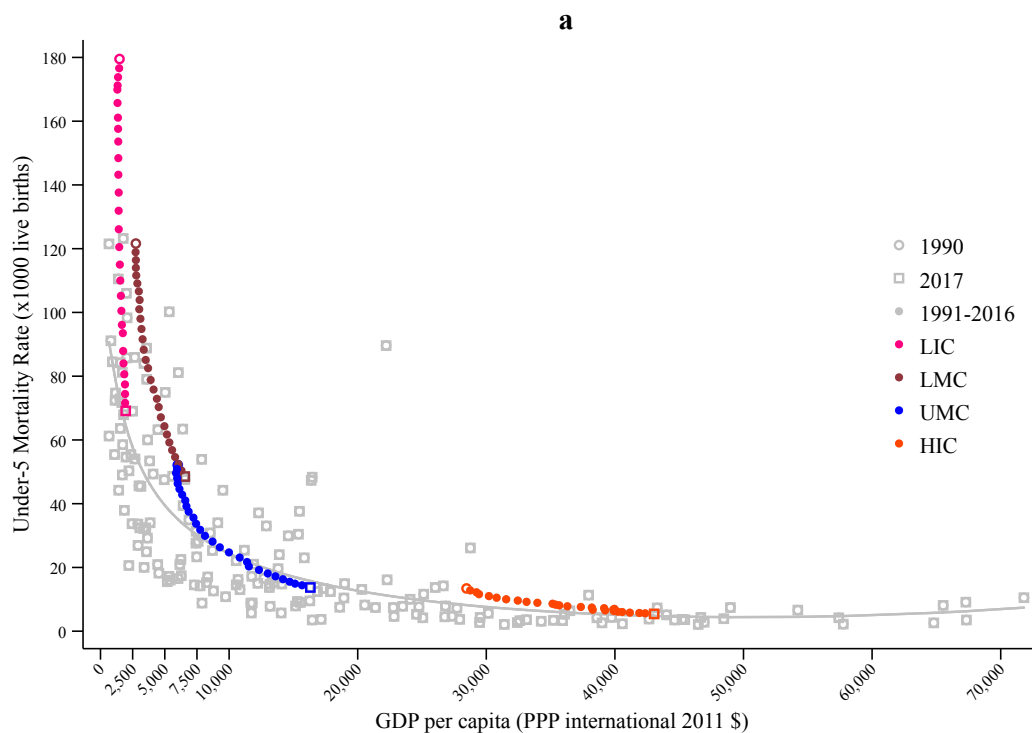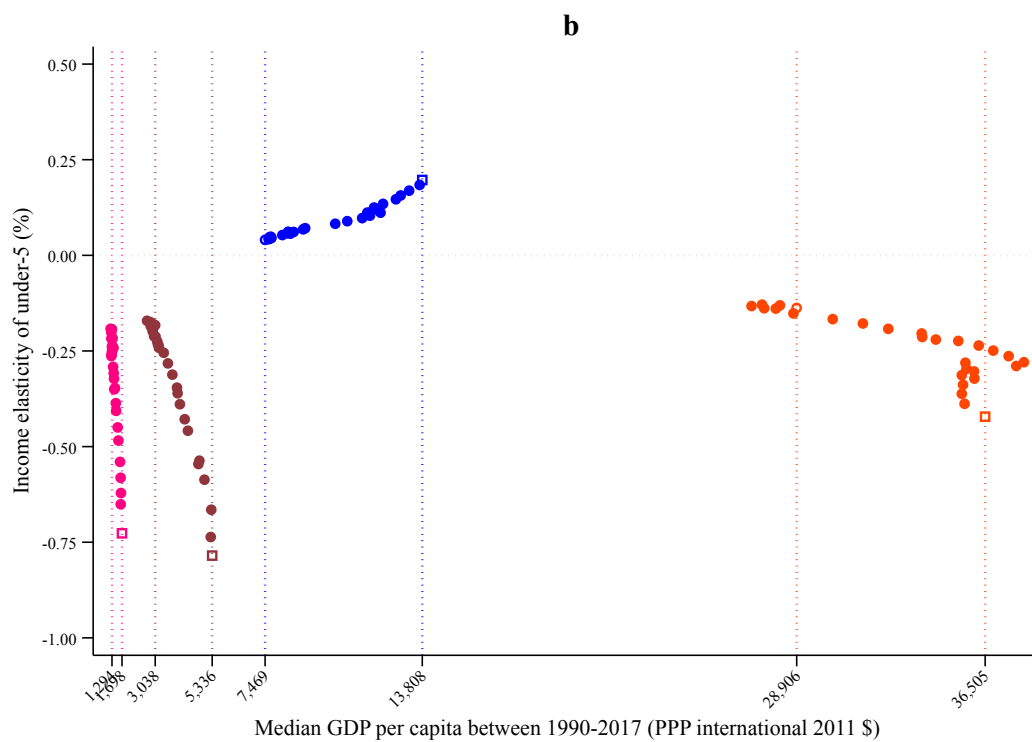

**Fig. 4 | Worldwide association of under-5 mortality and economic development. a,** Country-wise association of GDP per capita income and under-5 mortality rates in 2017. GDP per capita is expressed in international 2001 Purchasing Power Parity (PPP) United States Dollars (USD), under-5 mortality rates as deaths per 1,000 live births, and yearly average values are shown for the period between 1990 and 2017 by economic region (in color). The adjusted curve represents the prediction of under-5 mortality from an estimated fractional polynomial of income. **b,** Conditional marginal effects of income between 1990 and 2017 by economic region. Income elasticity of mortality represents a % change in under-5 mortality for a % change in GDP per capita. Vertical dotted lines indicate the median GDP at the initial and end of the period in each economic region. Data are from World Development Indicators, retrieved online from The World Bank (2019), which included 217 countries worldwide (8 countries with GDP above 70,000 are not displayed in panel **b**, classified in 4 economic regions: low-income (LIC—pink), low-middle-income (LMC—maroon), upper-middle-income (UMC—blue), and high-income (HIC—orange) (Supplementary Methods).

# Extended Data

Denmark: 1901-2016

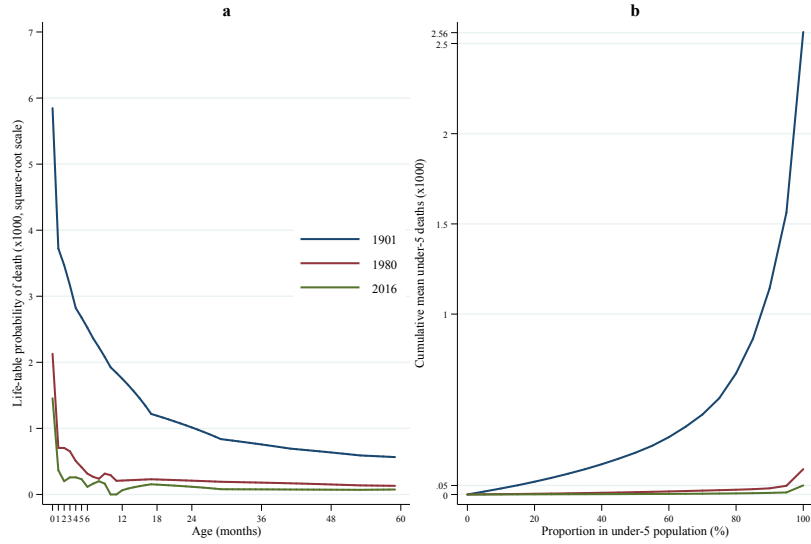

Rwanda

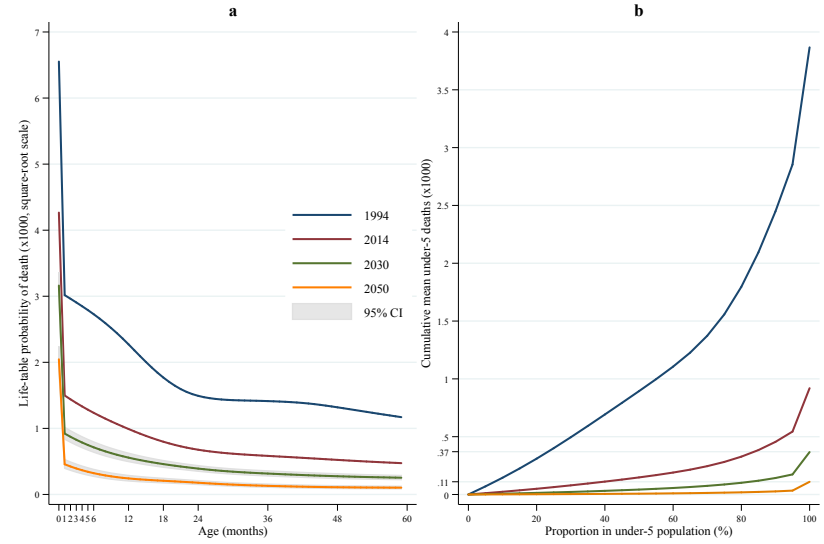

### Kenya

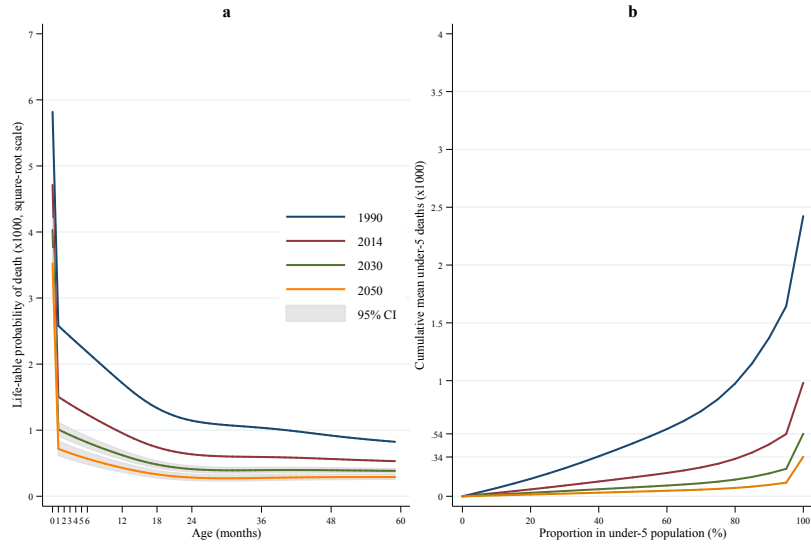

### Senegal

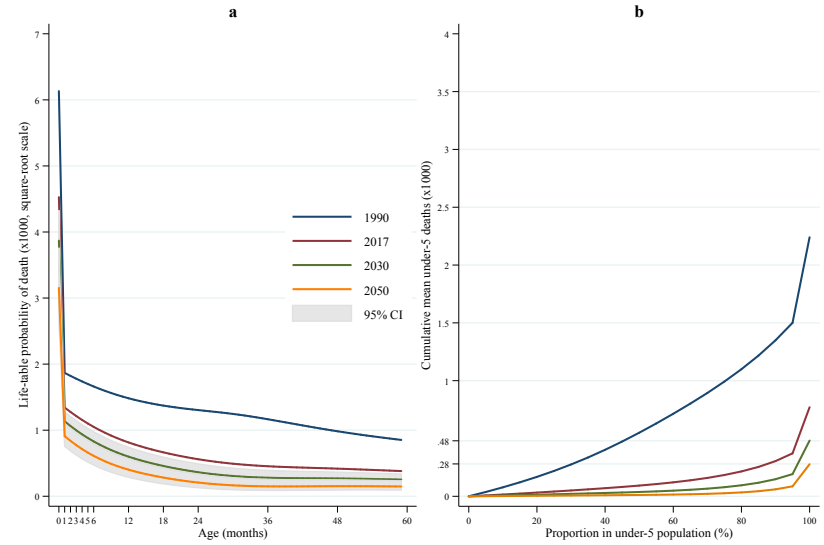

### Gabon

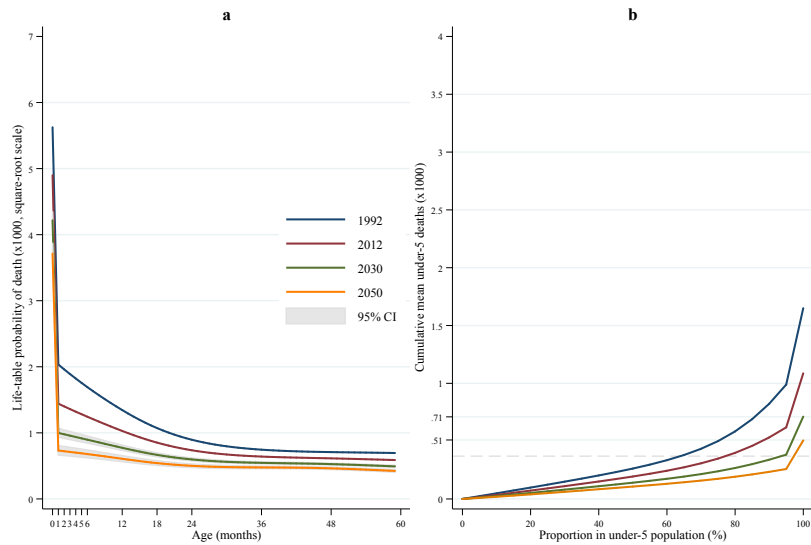

### Nigeria

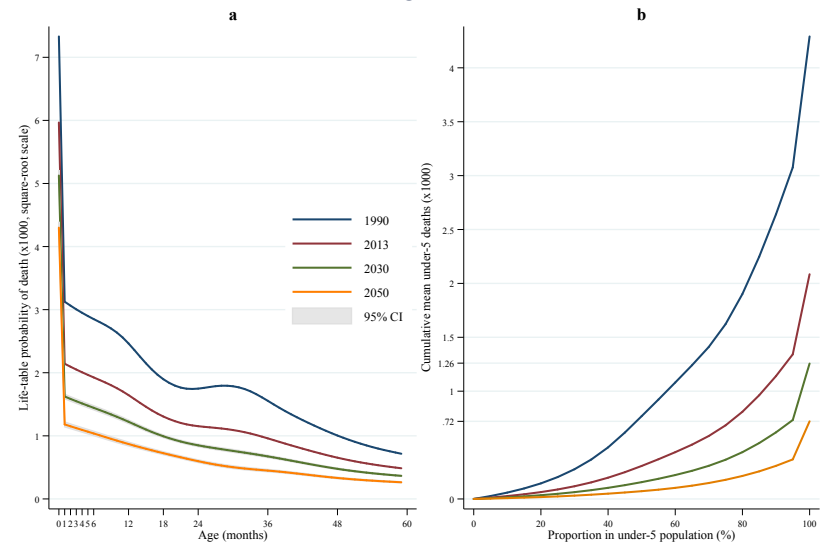



**Extended Data Fig. 1 | Age patterns of under-5 deaths and inequality in the age at death. a,** Detailed age-at-death distribution of under-5 deaths in Denmark (1901-2016) and four selected countries from SSA (Gabon, Kenya, Nigeria, and Senegal). Age is measured in months in the x-axis and life-table probabilities of dying are represented in the y-axis (x1000 in square-root scale). Forecasts of mortality age profiles were conducted for countries in SSA by 2030 and 2050. **b,** Generalized Lorenz curves in the same selected countries showed in **a**). Generalized Lorenz curves are constructed as the product of the standard Lorenz curve (Extended Data Fig. 1) and the mean mortality rates across ages (measured in months). It therefore illustrates the cumulative percentage of under-5 population (x-axis), ranked by the level of mortality at each age, and graphed against the cumulative mean under-5 deaths (y-axis) (Supplementary Methods and Extended Data Table1).

**a**

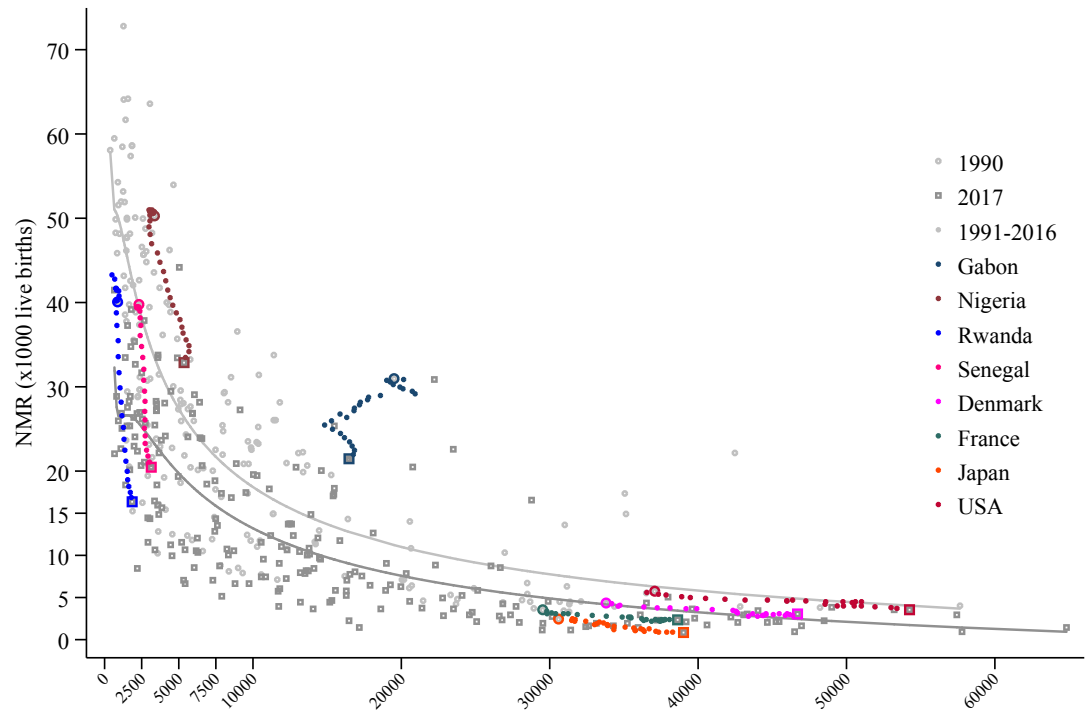

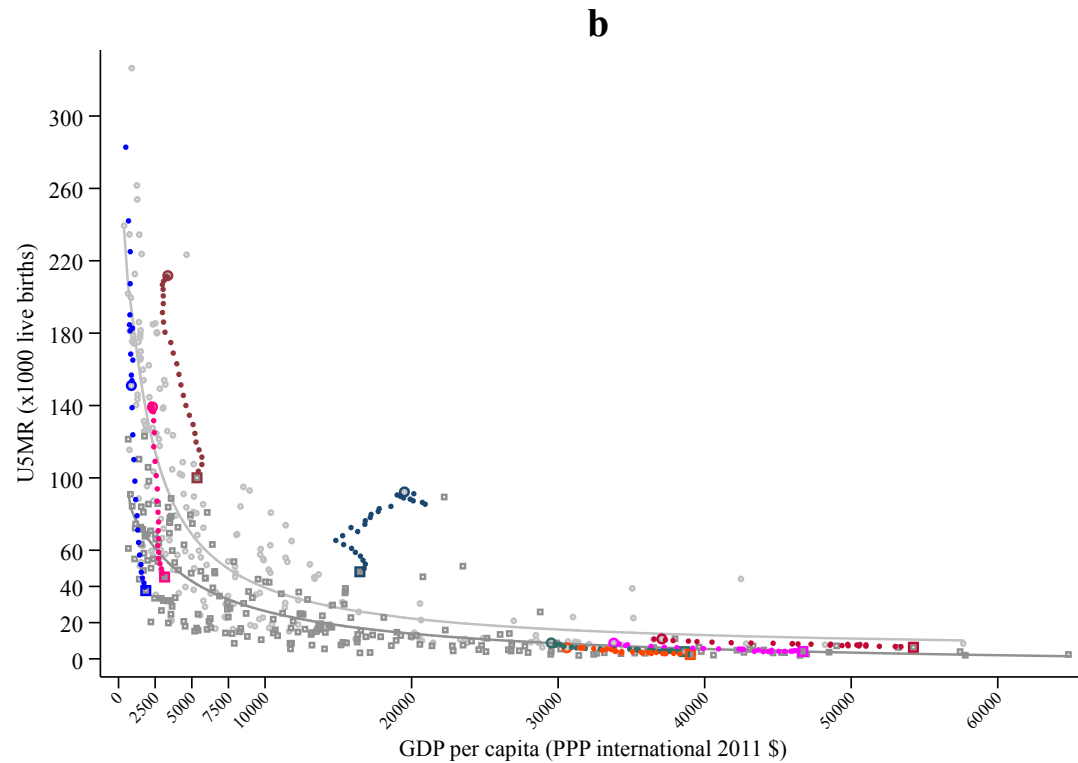

**Extended Data Fig. 2 | Worldwide association of neonatal and under-5 mortality and economic development. a**, Country-wise association of GDP per capita income and neonatal mortality rates in 1990 and 2017. **b**, Country-wise association of GDP per capita income and under-5 mortality rates in 1990 and 2017. GDP per capita is expressed in international 2001 PPP USD, mortality rates as deaths per 1,000 live births, and yearly average values are shown for the period between 1990 and 2017 by economic region (in color). The adjusted curves represent the prediction of neonatal or under-5 mortality from an estimated fractional polynomial of income. Data are from World Development Indicators, retrieved online from The World Bank (2019), which included 217 countries worldwide (8 countries with GDP above 70,000 are not displayed in panel **b**), classified in 4 economic regions: low-income (LIC—pink), low-middle-income (LMC—maroon), upper-middle-income (UMC—blue), and high-income (HIC—orange) (Supplementary Methods).

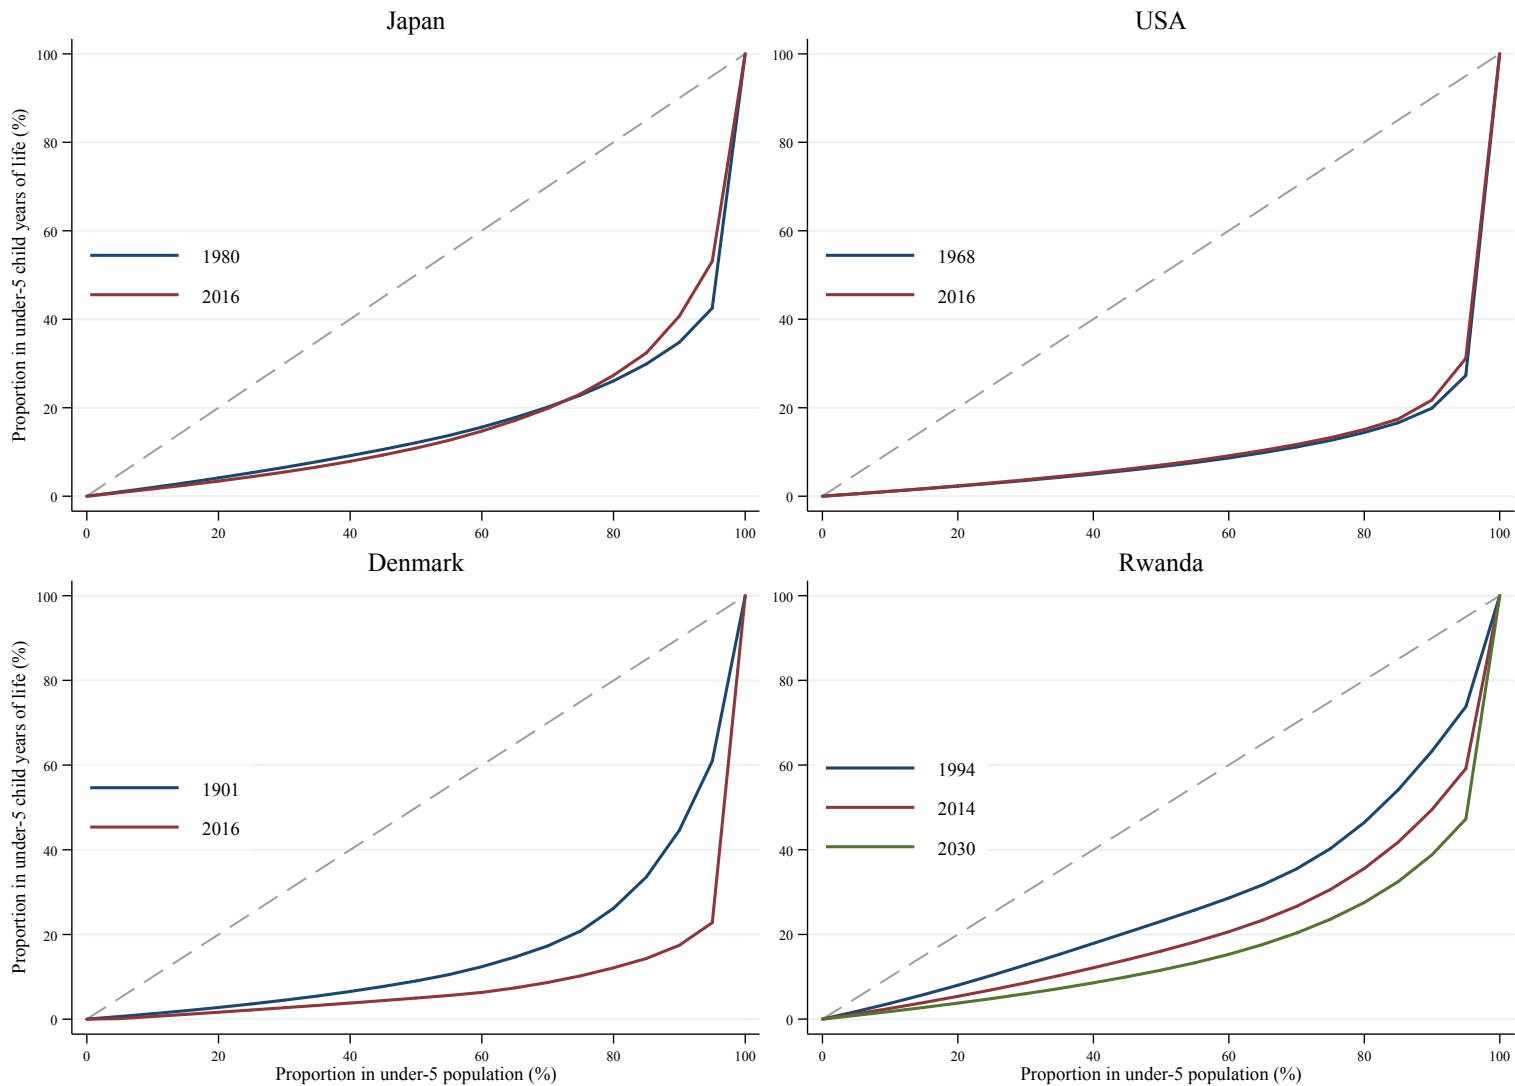

**Extended Data Fig. 3 | Under-5 inequality in the age at death.** Standard Lorenz curves for the first and the latest observed years in Denmark (1901, 2016), Japan (1980, 2016), the U.S.A. (1968, 2016), and Rwanda (1994, 2014, 2030). The Lorenz curve measures age inequality in the age at death distribution of under-5 deaths, and indicate less inequality if they move away (to the right) from the 45°

line that in the context of child mortality represents mortality evenly distributed across ages. Two times the area gap between the 45° line and the Lorenz curve is known as the Gini coefficient ( $G_{[0]}$ ), which increases as under-5 inequality declines (until certain level where the relative importance of neonatal mortality declines relative to that at other ages, as occurring in the case of Japan or the USA) (Supplementary Methods and Extended Data Table1).

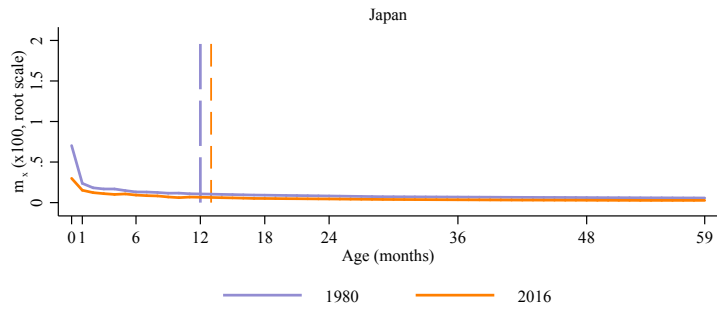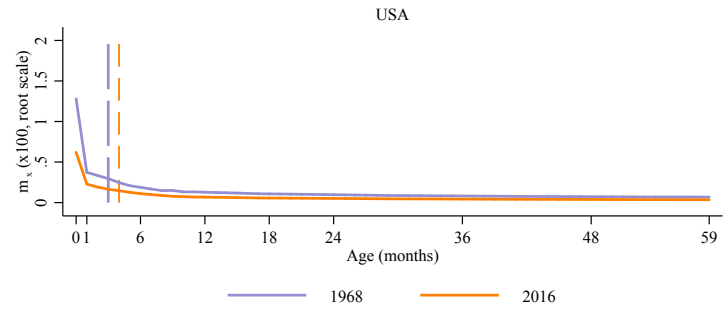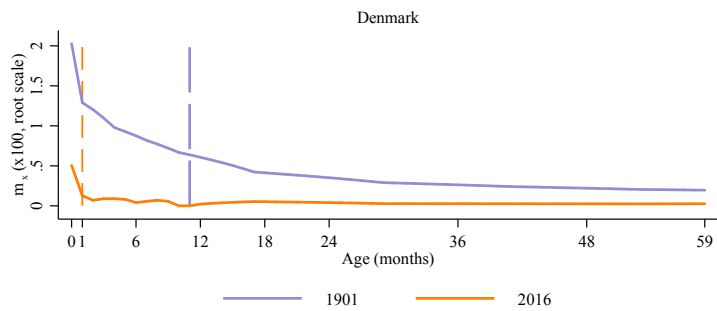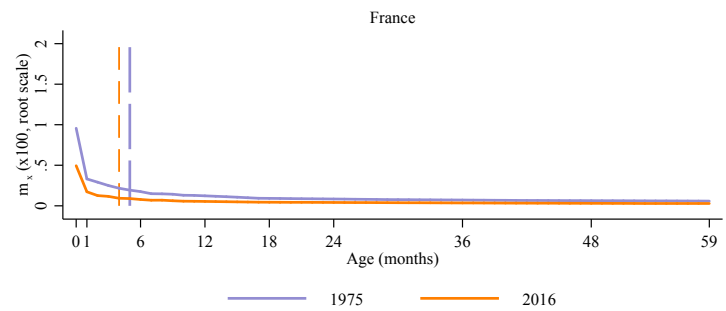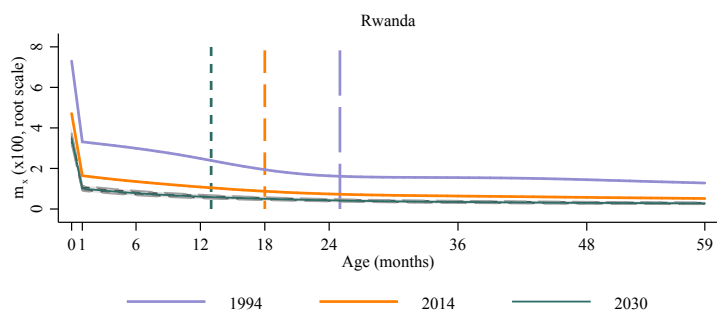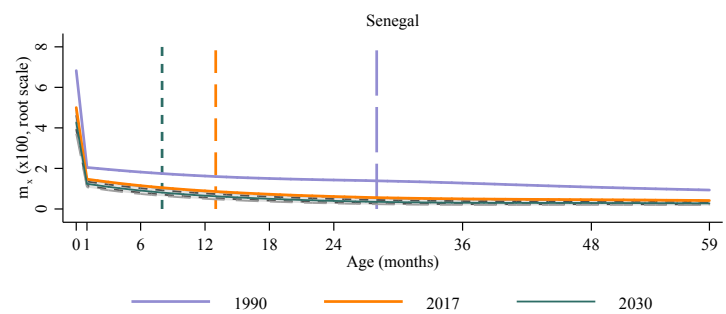

**Extended Data Fig. 4 | Age distribution and compression of under-5 mortality.** Change in mortality rates by age and the upper quartile of the conditional distribution of age at death ( $A_{75}$ ) between the first and latest observed year, and projected by 2030 (the target year for the SDG-3 of child mortality reduction) in selected countries: Denmark, France, Japan, USA, Rwanda, and Senegal. These countries were selected to represent different trajectories in developed countries and to illustrate trajectories of the most successful countries in SSA in terms of under-5 mortality reduction within the past 25 years, like Rwanda and Senegal advancing rapidly and likely to reach the SDD-3 by 2030, but with relatively high neonatal mortality as compared to Denmark and France, countries in a very advanced mortality transition and low child mortality. Vertical lines represent the age where 75% of under-5 deaths took place in the respective year. For instance, in Rwanda, 75% of under-5 deaths occurred during the first 2 years of life in 1994, before 18 months in 2014, and they would occur before 12 months in 2030; whereas in Denmark, the 12 months of life concentrated the same 75% of under-5 deaths around 1901 (130 years ago). Data are from 31 DHS surveys and publicly available mortality records from Denmark, France, Japan, and the USA (Supplementary Methods).

**Extended Data Table 1 | Income, mortality, and age-at-death indicators of compression and inequality.**

| Country                    | Year        |             | T   | GDP (2011 PPP\$) |       |      | Neonatal Mortality |     |     | Under-5 Mortality |     |      | A <sub>75</sub> |     | E <sub>[0]</sub> |      | S <sub>[0]</sub> |      | G <sub>[0]</sub> |     |
|----------------------------|-------------|-------------|-----|------------------|-------|------|--------------------|-----|-----|-------------------|-----|------|-----------------|-----|------------------|------|------------------|------|------------------|-----|
|                            | (1)         | (2)         |     | (1)              | (2)   | AGR  | (1)                | (2) | ARR | (1)               | (2) | ARR  | (1)             | (2) | (1)              | (2)  | (1)              | (2)  | (1)              | (2) |
| <b>Low-income</b>          | <b>1990</b> | <b>2017</b> |     |                  |       |      |                    |     |     |                   |     |      |                 |     |                  |      |                  |      |                  |     |
| Benin                      | 1990        | 2012        | 24  | 1463             | 1856  | 1.1  | 45                 | 35  | 1.1 | 177               | 108 | 2.2  | 24              | 21  | 14.3             | 13.2 | 16.4             | 16.3 | 1.5              | 1.0 |
| Burkina Faso               | 1990        | 2010        | 22  | 844              | 1423  | 2.6  | 44                 | 31  | 1.8 | 199               | 116 | 2.7  | 27              | 24  | 15.9             | 14.6 | 16.3             | 16.0 | 1.5              | 1.0 |
| Burundi                    | 1990        | 2017        | 11  | 1032             | 668   | -1.6 | 40                 | 22  | 2.2 | 179               | 62  | 3.9  | 23              | 16  | 14.7             | 10.6 | 16.7             | 14.6 | 1.5              | 0.7 |
| Chad                       | 1990        | 2015        | 22  | 1110             | 2067  | 2.5  | 50                 | 36  | 1.3 | 215               | 131 | 2.0  | 26              | 25  | 15.7             | 14.5 | 16.5             | 16.7 | 1.7              | 1.1 |
| DR of Congo                | 1991        | 2014        | 22  | 1224             | 785   | -1.9 | 42                 | 30  | 1.4 | 193               | 102 | 2.8  | 20              | 13  | 13.1             | 10.1 | 15.1             | 13.9 | 1.8              | 1.1 |
| Ethiopia                   | 1990        | 2016        | 28  | 652              | 1608  | 3.5  | 60                 | 30  | 2.7 | 204               | 64  | 4.4  | 26              | 16  | 14.4             | 10.7 | 17.4             | 15.8 | 1.8              | 0.7 |
| Gambia                     | 1993        | 2013        | 6   | 1504             | 1585  | 0.3  | 48                 | 30  | 2.3 | 154               | 73  | 3.7  | 33              | 22  | 17.8             | 12.7 | 18.8             | 16.6 | 1.0              | 0.7 |
| Guinea                     | 1990        | 2012        | 24  | 1412             | 1684  | 0.8  | 67                 | 28  | 3.9 | 240               | 103 | 3.8  | 22              | 20  | 13.4             | 12.9 | 15.8             | 15.0 | 2.2              | 1.0 |
| Liberia*                   | 1991        | 2011        | 12  | 1292             | 1139  | -1.2 | 56                 | 29  | 3.2 | 257               | 96  | 4.8  | 16              | 15  | 11.6             | 10.4 | 14.2             | 13.5 | 2.7              | 1.0 |
| Malawi                     | 1990        | 2016        | 23  | 744              | 1084  | 1.5  | 52                 | 23  | 3.1 | 256               | 71  | 4.8  | 21              | 21  | 13.8             | 12.7 | 15.1             | 15.7 | 2.4              | 0.7 |
| Mali                       | 1990        | 2012        | 24  | 1272             | 1805  | 1.6  | 67                 | 39  | 2.4 | 252               | 126 | 3.1  | 27              | 27  | 15.6             | 15.1 | 16.4             | 17.3 | 2.0              | 1.0 |
| Mozambique                 | 1990        | 2011        | 23  | 379              | 955   | 4.5  | 60                 | 31  | 3.1 | 261               | 100 | 4.5  | 18              | 16  | 12.2             | 11.4 | 15.1             | 15.1 | 2.7              | 1.0 |
| Niger                      | 1990        | 2012        | 24  | 895              | 863   | -0.2 | 55                 | 30  | 2.8 | 345               | 114 | 4.9  | 30              | 27  | 18.0             | 15.5 | 15.7             | 16.3 | 2.4              | 0.9 |
| Rwanda                     | 1994        | 2014        | 22  | 497              | 1633  | 6.1  | 43                 | 18  | 4.2 | 208               | 54  | 6.5  | 25              | 18  | 15.3             | 12.0 | 16.6             | 15.6 | 1.7              | 0.5 |
| Senegal                    | 1990        | 2017        | 28  | 2314             | 3143  | 1.1  | 38                 | 21  | 2.2 | 126               | 45  | 3.7  | 28              | 13  | 15.9             | 9.4  | 17.1             | 14.5 | 1.0              | 0.5 |
| Sierra Leone               | 1993        | 2013        | 6   | 1052             | 1655  | 2.3  | 52                 | 38  | 1.6 | 252               | 138 | 3.0  | 21              | 14  | 13.5             | 9.7  | 15.2             | 11.7 | 2.4              | 1.6 |
| Togo                       | 1990        | 2014        | 13  | 1294             | 1406  | 0.3  | 43                 | 27  | 1.9 | 150               | 80  | 2.6  | 22              | 20  | 13.6             | 12.6 | 16.1             | 16.1 | 1.4              | 0.8 |
| Uganda                     | 1990        | 2016        | 24  | 769              | 1689  | 3.1  | 35                 | 21  | 1.9 | 186               | 53  | 4.7  | 21              | 14  | 14.1             | 9.7  | 15.4             | 13.7 | 1.6              | 0.6 |
| Tanzania                   | 1990        | 2016        | 19  | 1473             | 2584  | 2.2  | 37                 | 22  | 2.1 | 170               | 57  | 4.2  | 21              | 16  | 13.9             | 10.5 | 15.7             | 14.5 | 1.5              | 0.6 |
| Zimbabwe                   | 1990        | 2015        | 16  | 2889             | 2197  | -1.1 | 29                 | 24  | 0.8 | 103               | 75  | 1.2  | 24              | 21  | 14.1             | 13.0 | 16.5             | 16.2 | 0.9              | 0.7 |
| <b>Lower-middle-income</b> |             |             |     |                  |       |      |                    |     |     |                   |     |      |                 |     |                  |      |                  |      |                  |     |
| Angola                     | 1991        | 2016        | 7   | 4538             | 6265  | 1.3  | 54                 | 30  | 2.4 | 232               | 85  | 4.0  | 25              | 20  | 14.7             | 12.4 | 16.7             | 16.3 | 2.0              | 0.8 |
| Cameroon                   | 1990        | 2011        | 23  | 3020             | 2969  | -0.1 | 34                 | 29  | 0.9 | 143               | 106 | 1.4  | 21              | 20  | 13.5             | 12.9 | 15.4             | 15.1 | 1.3              | 1.0 |
| Congo                      | 1993        | 2012        | 13  | 4928             | 5271  | 0.4  | 34                 | 22  | 2.4 | 126               | 71  | 2.9  | 20              | 19  | 13.1             | 12.0 | 15.8             | 15.0 | 1.2              | 0.7 |
| Cote d'Ivoire              | 1990        | 2012        | 15  | 3194             | 2712  | -0.7 | 52                 | 37  | 1.6 | 164               | 112 | 1.7  | 16              | 16  | 11.2             | 11.2 | 14.8             | 14.9 | 1.7              | 1.2 |
| Ghana                      | 1991        | 2014        | 13  | 1966             | 3828  | 2.9  | 40                 | 27  | 1.7 | 117               | 59  | 2.9  | 21              | 15  | 12.9             | 9.7  | 16.1             | 14.2 | 1.1              | 0.7 |
| Kenya                      | 1990        | 2014        | 15  | 2380             | 2753  | 0.6  | 34                 | 22  | 1.7 | 136               | 57  | 3.5  | 21              | 17  | 13.4             | 11.6 | 15.9             | 16.1 | 1.2              | 0.6 |
| Lesotho                    | 1995        | 2010        | 11  | 1628             | 2366  | 2.5  | 42                 | 42  | 0.1 | 111               | 116 | -0.3 | 15              | 15  | 10.4             | 10.6 | 15.0             | 15.0 | 1.2              | 1.2 |
| Nigeria                    | 1990        | 2013        | 25  | 3359             | 5492  | 2.2  | 54                 | 36  | 1.8 | 229               | 118 | 2.8  | 21              | 19  | 13.1             | 11.8 | 14.3             | 14.1 | 2.2              | 1.2 |
| <b>Upper-middle-income</b> |             |             |     |                  |       |      |                    |     |     |                   |     |      |                 |     |                  |      |                  |      |                  |     |
| Zambia                     | 1990        | 2014        | 23  | 2342             | 3633  | 1.8  | 37                 | 24  | 1.9 | 180               | 68  | 4.0  | 22              | 17  | 13.8             | 11.2 | 14.9             | 14.9 | 1.6              | 0.7 |
| Gabon                      | 1992        | 2012        | 10  | 19006            | 16159 | -0.8 | 32                 | 24  | 1.4 | 95                | 63  | 2.0  | 18              | 20  | 11.9             | 12.5 | 15.7             | 16.5 | 0.9              | 0.6 |
| Namibia                    | 1992        | 2007        | 7   | 6270             | 8098  | 1.7  | 27                 | 20  | 2.0 | 76                | 69  | 0.6  | 17              | 18  | 11.2             | 12.2 | 15.0             | 15.3 | 0.8              | 0.7 |
| <b>High-income*</b>        |             |             |     |                  |       |      |                    |     |     |                   |     |      |                 |     |                  |      |                  |      |                  |     |
| Denmark                    | 1901        | 2016        | 116 | 33786            | 45991 | 1.2  | 34                 | 2   | 2.4 | 143               | 3   | 3.3  | 11              | 1   | 8.8              | 4.7  | 12.3             | 11.2 | 1.7              | 0.0 |
| France                     | 1975        | 2016        | 42  | 29515            | 38063 | 1.0  | 8                  | 2   | 3.2 | 14                | 3   | 3.3  | 5               | 4   | 6.3              | 5.9  | 12.4             | 12.3 | 0.2              | 0.0 |
| Japan                      | 1980        | 2016        | 37  | 30582            | 38283 | 0.9  | 4                  | 1   | 4.6 | 8                 | 2   | 3.6  | 12              | 13  | 9.0              | 9.5  | 14.7             | 13.8 | 0.1              | 0.0 |
| USA                        | 1968        | 2016        | 49  | 37062            | 53399 | 1.4  | 14                 | 3   | 3.0 | 21                | 6   | 2.7  | 3               | 4   | 5.2              | 5.6  | 11.7             | 11.9 | 0.3              | 0.1 |

\* GDP for Liberia corresponds to 2001 and to 1990 for Denmark, France, Japan, and the U.S.A.



Complete list of countries classified by income group, and indicators of income and mortality for the initial and end year of analysis: GDP per capita levels (in international PPP 2011\$) (GDP for Liberia corresponds to 2001 and to 1990 in Denmark, France, Japan, and the USA), and average growth rate (AGR); neonatal and under-5 mortality rates, and average rates of reduction (ARR); upper quartile of the conditional distribution of age at death ( $A_{75}$ ); mean ( $E_{[0]}$ ) and standard deviation ( $S_{[0]}$ ) of age at death; and Generalized Gini Index ( $G_{[0]}$ ).

# Supplementary Information

**Fig. S1** | Assessment of infant mortality fit from monthly-based age profiles and infant mortality from the Human Mortality Database (HMD) from Denmark, France, Japan, and the USA (Supplementary Methods)

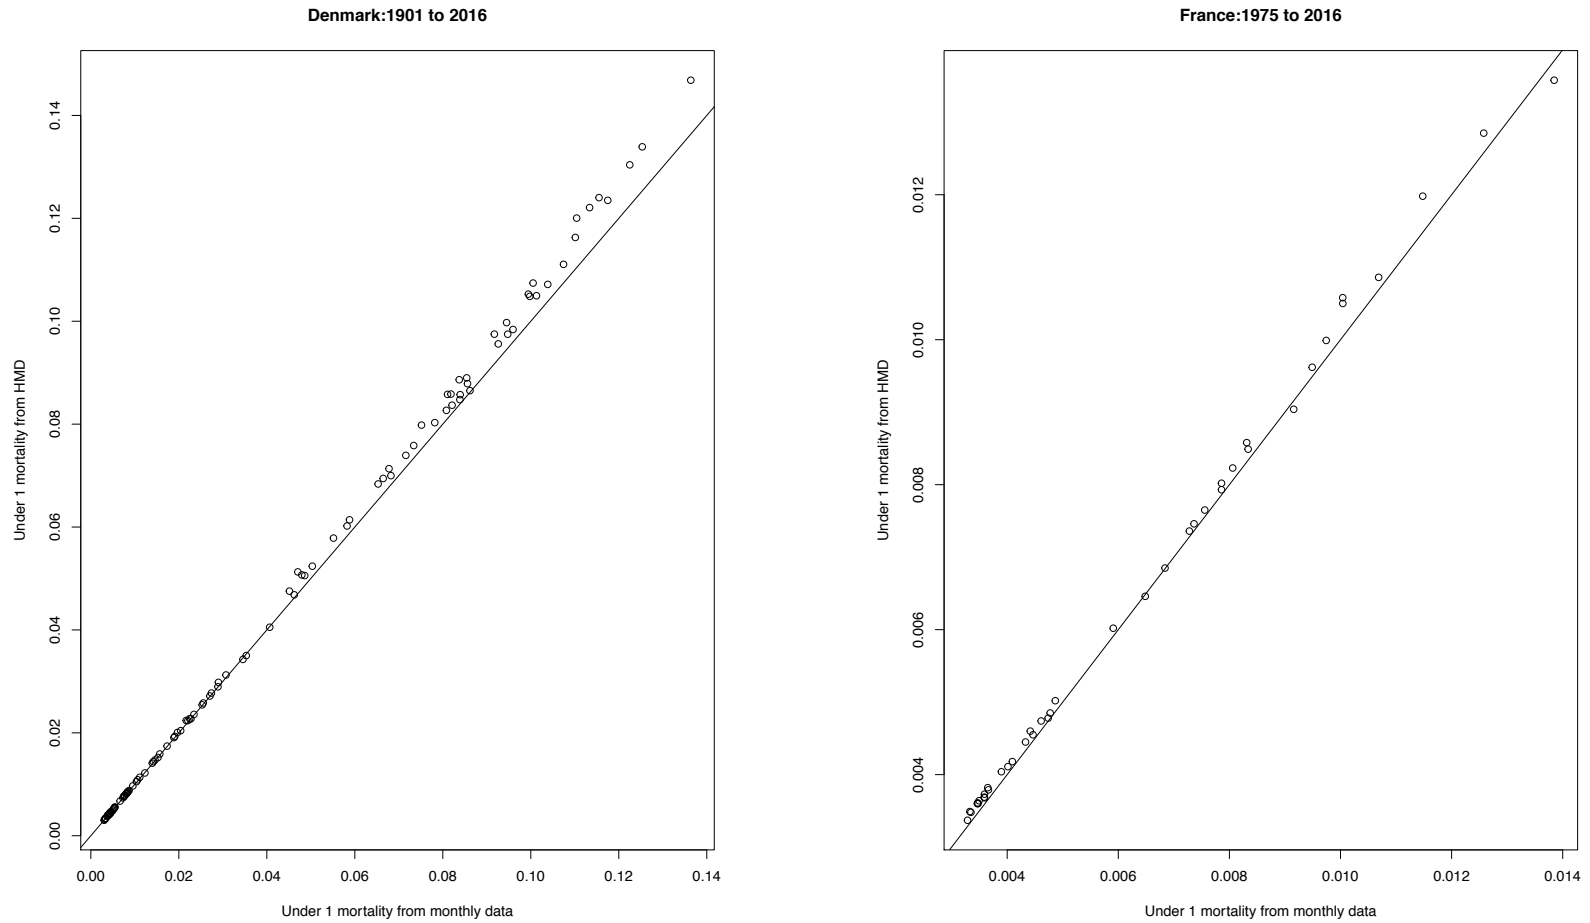

Japan:1980 to 2016

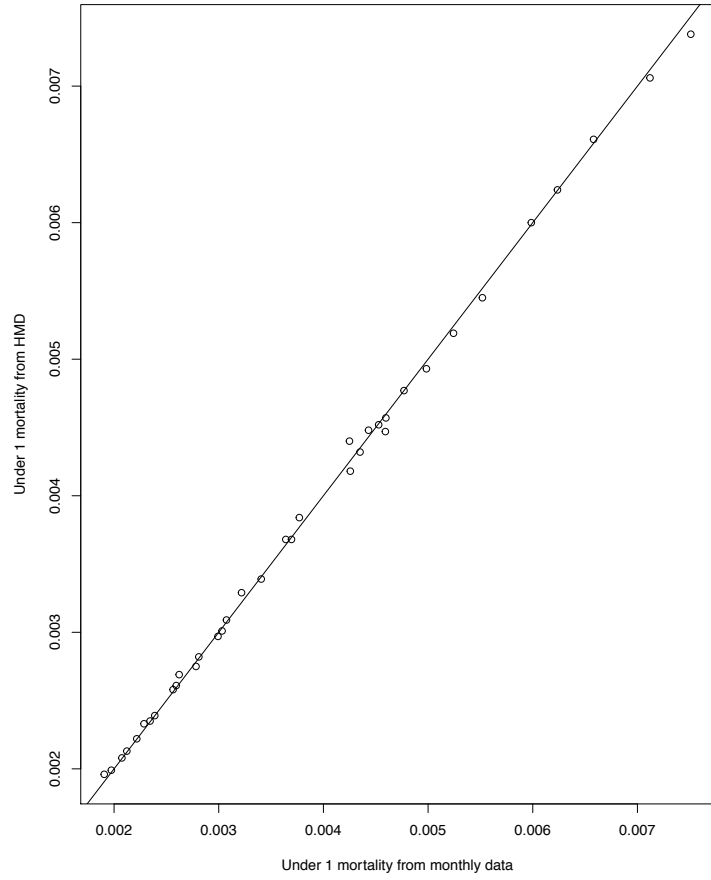

USA:1968 to 2016

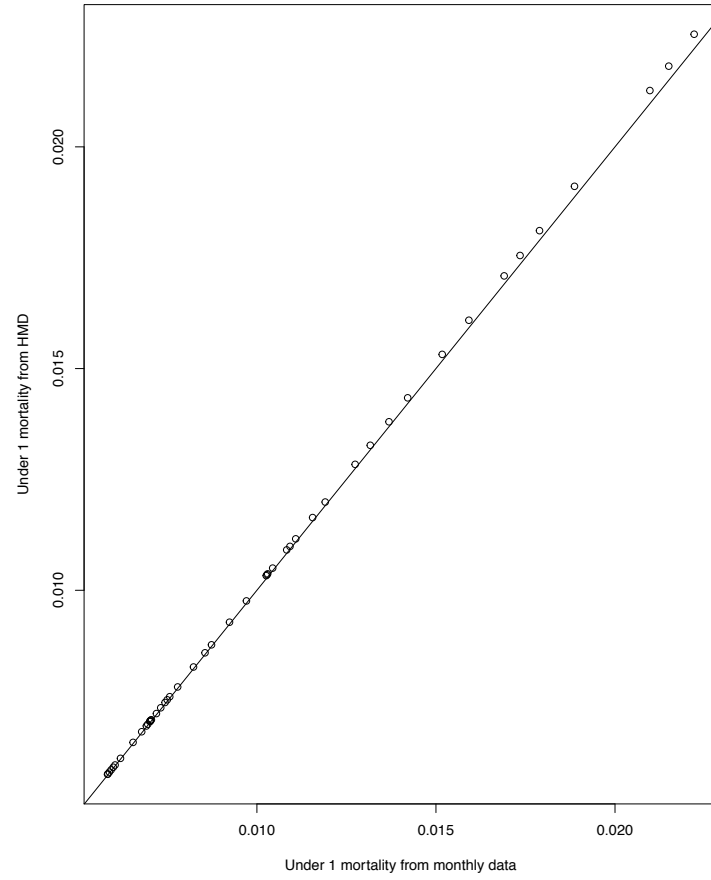

Source: https://www.biorxiv.org/content/10.1101/591925v2.full.pdf
